# Supplementary material for: Acute rule-out of non–ST-segment elevation acute coronary syndrome in the (pre)hospital setting by HEART score assessment and a single point-of-care troponin: rationale and design of the ARTICA randomised trial
Source: PubMed Central journal article supplement — BMJ Open. 2020 Feb 17;10(2):e034403. doi: 10.1136/bmjopen-2019-034403 (PMC7044902; doi:10.1136/bmjopen-2019-034403), 2020-02-17
Supplement: bmjopen-2019-034403.draft_revisions.pdf [file bmjopen-2019-034403.draft_revisions.pdf]

# BMJ Open

BMJ Open is committed to open peer review. As part of this commitment we make the peer review history of every article we publish publicly available.

When an article is published we post the peer reviewers' comments and the authors' responses online. We also post the versions of the paper that were used during peer review. These are the versions that the peer review comments apply to.

The versions of the paper that follow are the versions that were submitted during the peer review process. They are not the versions of record or the final published versions. They should not be cited or distributed as the published version of this manuscript.

BMJ Open is an open access journal and the full, final, typeset and author-corrected version of record of the manuscript is available on our site with no access controls, subscription charges or pay-per-view fees (<http://bmjopen.bmj.com>).

If you have any questions on BMJ Open's open peer review process please email [info.bmjopen@bmj.com](mailto:info.bmjopen@bmj.com)

# BMJ Open

## Acute rule out of non ST-segment elevation acute coronary syndrome in the (pre)hospital setting by HEART score assessment and a single point of care troponin: Rationale and design of the ARTICA randomized trial.

|                               |                                                                                                                                                                                                                                                                                                                                                                                                                                                                                                                                                                                                                                                                      |
|-------------------------------|----------------------------------------------------------------------------------------------------------------------------------------------------------------------------------------------------------------------------------------------------------------------------------------------------------------------------------------------------------------------------------------------------------------------------------------------------------------------------------------------------------------------------------------------------------------------------------------------------------------------------------------------------------------------|
| Journal:                      | <i>BMJ Open</i>                                                                                                                                                                                                                                                                                                                                                                                                                                                                                                                                                                                                                                                      |
| Manuscript ID                 | bmjopen-2019-034403                                                                                                                                                                                                                                                                                                                                                                                                                                                                                                                                                                                                                                                  |
| Article Type:                 | Protocol                                                                                                                                                                                                                                                                                                                                                                                                                                                                                                                                                                                                                                                             |
| Date Submitted by the Author: | 18-Sep-2019                                                                                                                                                                                                                                                                                                                                                                                                                                                                                                                                                                                                                                                          |
| Complete List of Authors:     | Aarts, Goaris; Radboudumc, Cardiology<br>Camaro, Cyril; Radboudumc, Cardiology<br>van Geuns, Robert-Jan; Radboudumc, Cardiology<br>Cramer, Etienne; Radboudumc, Cardiology<br>van Kimmenade, Roland; Radboudumc, Cardiology<br>Damman, P.; Radboudumc, Cardiology<br>van Grunsven, Pierre; Ambulancezorg Gelderland-Zuid<br>Adang, Eddy; Radboudumc, Health Evidence<br>Giesen, Paul; Radboudumc, Scientific Institute for Quality of Healthcare<br>Rutten, Martijn; Radboudumc, Scientific Institute for Quality of Healthcare<br>Ouwendijk, Olaf; Huisartsenpost Nijmegen<br>Gomes, Marc; Canisius Wilhelmina Hospital<br>van Royen, Niels; Radboudumc, Cardiology |
| Keywords:                     | Acute coronary syndrome, Pre-hospital, Ambulance, Point-of-care troponin, modified HEART score, Cost-effectiveness                                                                                                                                                                                                                                                                                                                                                                                                                                                                                                                                                   |
|                               |                                                                                                                                                                                                                                                                                                                                                                                                                                                                                                                                                                                                                                                                      |

SCHOLARONE™  
Manuscripts

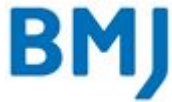

I, the Submitting Author has the right to grant and does grant on behalf of all authors of the Work (as defined in the below author licence), an exclusive licence and/or a non-exclusive licence for contributions from authors who are: i) UK Crown employees; ii) where BMJ has agreed a CC-BY licence shall apply, and/or iii) in accordance with the terms applicable for US Federal Government officers or employees acting as part of their official duties; on a worldwide, perpetual, irrevocable, royalty-free basis to BMJ Publishing Group Ltd ("BMJ") its licensees and where the relevant Journal is co-owned by BMJ to the co-owners of the Journal, to publish the Work in this journal and any other BMJ products and to exploit all rights, as set out in our [licence](#).

The Submitting Author accepts and understands that any supply made under these terms is made by BMJ to the Submitting Author unless you are acting as an employee on behalf of your employer or a postgraduate student of an affiliated institution which is paying any applicable article publishing charge ("APC") for Open Access articles. Where the Submitting Author wishes to make the Work available on an Open Access basis (and intends to pay the relevant APC), the terms of reuse of such Open Access shall be governed by a Creative Commons licence – details of these licences and which [Creative Commons](#) licence will apply to this Work are set out in our licence referred to above.

Other than as permitted in any relevant BMJ Author's Self Archiving Policies, I confirm this Work has not been accepted for publication elsewhere, is not being considered for publication elsewhere and does not duplicate material already published. I confirm all authors consent to publication of this Work and authorise the granting of this licence.

1  
2  
3 1 **Acute Rule out of non ST-segment elevation acute coronary syndrome in the**  
4  
5 2 **(pre)hospital setting by HEART I score assessment and a single poInt of Care**  
6  
7 3 **troponin: Rationale and design of the ARTICA randomized trial.**  
8  
9

10 4 **Authors**  
11

12  
13 5 G.W.A. Aarts, MD  
14 6 Radboudumc, department of Cardiology  
15 7 [Joris.Aarts@radboudumc.nl](mailto:Joris.Aarts@radboudumc.nl)  
16

17 8 C. Camaro, MD  
18 9 Radboudumc, department of Cardiology  
19 10 [Cyril.Camaro@radboudumc.nl](mailto:Cyril.Camaro@radboudumc.nl)  
20  
21

22 11 Prof R.J.M. van Geuns, MD, PhD  
23 12 Radboudumc, department of Cardiology  
24 13 [RobertJan.vanGeuns@radboudumc.nl](mailto:RobertJan.vanGeuns@radboudumc.nl)  
25  
26

27 14 G.E. Cramer, MD  
28 15 Radboudumc, department of Cardiology  
29 16 [Etienne.Cramer@radboudumc.nl](mailto:Etienne.Cramer@radboudumc.nl)  
30

31 17 R.R.J. van Kimmenade, MD, PhD  
32 18 Radboudumc, department of Cardiology  
33 19 [Roland.vanKimmenade@radboudumc.nl](mailto:Roland.vanKimmenade@radboudumc.nl)  
34  
35

36 20 P. Damman, MD, PhD  
37 21 Radboudumc, department of Cardiology  
38 22 [Peter.Damman@radboudumc.nl](mailto:Peter.Damman@radboudumc.nl)  
39  
40

41 23 P.M. van Grunsven, MD, PhD  
42 24 Ambulancezorg Gelderland Zuid  
43 25 [Pierre.van.Grunsvan@vrgz.nl](mailto:Pierre.van.Grunsvan@vrgz.nl)  
44

45 26 E.M.M. Adang, PhD  
46 27 Radboudumc, department for Health Evidence  
47 28 [Eddy.Adang@radboudumc.nl](mailto:Eddy.Adang@radboudumc.nl)  
48  
49

50 29 P.H.J. Giesen, MD, PhD  
51 30 IQ Healthcare  
52 31 [Paul.Giesen@radboudumc.nl](mailto:Paul.Giesen@radboudumc.nl)  
53  
54

55 32 M. Rutten, MD  
56 33 IQ Healthcare  
57 34 [Martijn.Rutten@radboudumc.nl](mailto:Martijn.Rutten@radboudumc.nl)  
58  
59  
60

1  
2  
3  
4  
5  
6  
7  
8  
9  
10  
11  
12  
13  
14  
15  
16  
17  
18  
19  
20  
21  
22  
23  
24  
25  
26  
27  
28  
29  
30  
31  
32  
33  
34  
35  
36  
37  
38  
39  
40  
41  
42  
43  
44  
45  
46  
47  
48  
49  
50  
51  
52  
53  
54  
55  
56  
57  
58  
59  
60

35 O. Ouwendijk, MD  
36 Huisartsenpost Nijmegen  
37 [O.Ouwendijk@cihn.nl](mailto:O.Ouwendijk@cihn.nl)

38 M.E.R. Gomes, MD, PhD  
39 Canisius Wilhelmina Hospital, department of Cardiology  
40 [Marc.Gomes@cwz.nl](mailto:Marc.Gomes@cwz.nl)

41 Prof N. van Royen, MD, PhD  
42 Radboudumc, department of Cardiology  
43 [Niels.vanRoyen@radboudumc.nl](mailto:Niels.vanRoyen@radboudumc.nl)

44 **Corresponding author:**

45 Prof N. van Royen, MD, PhD  
46 Radboudumc, department of Cardiology  
47 [Niels.vanRoyen@radboudumc.nl](mailto:Niels.vanRoyen@radboudumc.nl)

For peer review only

## 48 Abstract

49 *Introduction:* Because of the lack of pre-hospital protocols to rule out a non-ST elevation acute  
50 coronary syndrome (NSTEMI-ACS), patients with chest pain are often transferred to the emergency  
51 department (ED) for thorough evaluation. However, in low-risk patients, an ACS is rarely found,  
52 resulting in unnecessary health-care consumption. Using the HEART score, low-risk patients are easily  
53 identified. When a point-of-care (POC) troponin measurement is included in the HEART score, an ACS  
54 can adequately be ruled out in low-risk patients in the pre-hospital setting. However, it remains  
55 unclear whether a pre-hospital rule-out strategy using the HEART score and a POC troponin  
56 measurement in suspected NSTEMI-ACS patients is cost-effective.

57 *Methods and analysis:* The ARTICA trial is a randomized trial in which the primary objective is to  
58 investigate the cost-effectiveness after 30 days of an early rule-out strategy for low-risk patients  
59 suspected of a NSTEMI-ACS, using a modified HEART score including a POC troponin T measurement.  
60 Patients are included by ambulance paramedics and 1:1 randomized for 1) presentation at the ED  
61 (control group) or 2) POC troponin T measurement (intervention group) and transfer of the care to  
62 the general practitioner in case of a low troponin T value. In total, 866 patients will be included.  
63 Follow-up will be performed after 30 days, 6 months and 12 months.

64 *Ethics and dissemination:* This trial has been accepted by the Medical Research Ethics Committee  
65 region Arnhem-Nijmegen. The results of this trial will be disseminated in one main paper and in  
66 additional papers with subgroup analyses.

## 68 Article summary

### 69 *Strengths and limitations of this study*

- 70 • The ARTICA trial is the first randomized trial with a primary focus on cost-effectiveness of an  
71 early rule-out strategy for low-risk patients suspected of an acute coronary syndrome.
- 72 • When randomized for point-of-care troponin T measurement, the ambulance paramedics  
73 can rule out an acute coronary syndrome on the spot and therefore comfort the patient  
74 without having to transfer them to the emergency department.
- 75 • Underestimation of the HEART score could result in patients being misclassified as low-risk  
76 patients, although the HEART score has proven to have an excellent inter-operator agreement  
77 in both nurses and doctors.
- 78 • In order to calculate the HEART score correctly, the ambulance paramedics have to register  
79 every component of the HEART score digitally before inclusion in the trial.
- 80 • The point-of-care troponin T measurement used in this trial is less sensitive than the high-  
81 sensitive troponin T measurements in the hospital laboratory, but when combined with the

1  
2  
3  
4  
5  
6  
7  
8  
9  
10  
11  
12  
13  
14  
15  
16  
17  
18  
19  
20  
21  
22  
23  
24  
25  
26  
27  
28  
29  
30  
31  
32  
33  
34  
35  
36  
37  
38  
39  
40  
41  
42  
43  
44  
45  
46  
47  
48  
49  
50  
51  
52  
53  
54  
55  
56  
57  
58  
59  
60

82 other components of the HEART score, the sensitivity of this modified HEART score is still  
83 high.

84

85 **Keywords**

86 Acute coronary syndrome, pre-hospital, ambulance, point-of-care troponin, modified HEART score,  
87 cost-effectiveness

For peer review only

## 88 **Background and rationale**

89 Acute chest pain poses a daily challenge for general practitioners and ambulance paramedics. Since  
90 ischemic heart disease is the single most common cause of death worldwide, early risk stratification  
91 is crucial.<sup>1</sup> The diagnostic foundation when an ACS is suspected is a combination of a 12-lead  
92 electrocardiogram (ECG), clinical evaluation and cardiac troponin measurements.<sup>2</sup> In patients  
93 presenting with an acute ST-segment elevation myocardial infarction (STEMI), the diagnosis is  
94 relatively straightforward after obtaining an ECG. However, in more than one-third of the non-ST  
95 elevation acute coronary syndrome (NSTEMI) patients, the ECG is normal.<sup>2</sup> Hence, the vast majority  
96 of suspected ACS patients is in need of further evaluation and transferred to the emergency  
97 department (ED). Chest pain is therefore one of the most chief complaints in the ED, accounting for  
98 5-10% of all ED visits.<sup>3</sup> The number of patients visiting the ED with chest pain is increasing, causing  
99 overcrowding and even temporary closing of EDs<sup>4, 5</sup>, which is associated with worse patient  
100 outcomes.<sup>6</sup> In addition to the increasing number of patients, health care costs are also increasing,  
101 leading to a growing demand for efficiency.<sup>7</sup> Only 10-20% of the chest pain patients have an ACS and  
102 in patients at low risk for ACS, a NSTEMI is rarely found.<sup>8-10</sup> Still, these ED visits often include  
103 echocardiography, additional non-invasive ischemia detection and prolonged in-hospital stay.<sup>3</sup> These  
104 empirical strategies are costly, while low-risk patients are not likely to benefit from additional  
105 testing.<sup>8, 11</sup> A simple tool for risk stratification of chest pain patients is the HEART (History, ECG, Age,  
106 Risk factors, Troponin) score [figure 1], which is widely validated for use in the ED.<sup>12-15</sup> In the HEART  
107 score, patients can be given 0 to 10 points and patients with 0 to 3 points are at low risk for having an  
108 ACS. A recent meta-analysis showed that one-third of the patients presenting with chest pain have a  
109 HEART score of 0 to 3, with a risk of 1.9% of developing short-term (30 days to 6 weeks) major  
110 adverse cardiac events (MACE). The risk of MACE is even lower, 0.8%, when a modified low-risk, a  
111 HEART score of 0 to 3 with a negative troponin, is used.<sup>16</sup> Implementation of the HEART Pathway, a  
112 protocol in which early discharge from the ED without further testing is recommended in low-risk  
113 patients, resulted in significant cost savings without any MACE in the discharged patients.<sup>11, 17</sup> The  
114 HEART score has proven to have a high degree of reproducibility and an excellent inter-operator  
115 agreement in both nurses and doctors.<sup>18</sup> The FAMOUS triage study group has demonstrated that  
116 HEART score assessment by ambulance paramedics is feasible and safe.<sup>19</sup> Moreover, ambulance  
117 paramedics can adequately assess a complete HEART score, using a point-of-care (POC) troponin T  
118 measurement.<sup>20</sup> Thus, pre-hospital triage of patients suspected of a NSTEMI is possible. The cost-  
119 effectiveness of this pre-hospital strategy has not been investigated yet. Therefore, it remains  
120 unclear whether identification of low-risk patients presenting with chest pain in the pre-hospital  
121 setting and accordingly not transferring them to the ED will lead to a reduction in health care costs.



1  
2  
3 122 The aim of the ARTICA trial is to assess the cost-effectiveness of rule-out of a NSTEMI-ACS in low-risk  
4  
5 123 patients in the pre-hospital setting.

6  
7 124 **Methods**

8  
9  
10 125 *Objectives*

11  
12 126 The primary objective of the ARTICA trial is to investigate the cost-effectiveness, assessed by health  
13  
14 127 care costs after 30 days, of a pre-hospital rule-out strategy for low-risk patients suspected of a NSTEMI-  
15  
16 128 ACS, using a modified HEART score and a POC troponin T measurement, compared with standard  
17  
18 129 transfer to the ED. The secondary objective is to determine safety of this pre-hospital rule-out  
19  
20 130 strategy, defined as the incidence of MACE.

21  
22 131 *Design and population*

23  
24 132 The ARTICA trial is a randomized, investigator-initiated, multi-center study. Patients with possible  
25  
26 133 ACS are screened for eligibility by trained ambulance paramedics [figure 2]. The patients are  
27  
28 134 screened using the Castor Electronic Data Capture (Castor EDC) platform, in which the ambulance  
29  
30 135 paramedics register every aspect of the HEAR(T) score and the in- and exclusion criteria in order to  
31  
32 136 check for eligibility. The paramedics are able to send the ECG to a cardiologist digitally, in case of  
33  
34 137 doubt. After being informed by the ambulance professional and having provided written consent, the  
35  
36 138 patients will be subjected to a digital 1:1 randomization in Castor EDC. The standard care arm will be  
37  
38 139 transferred to the ED for further evaluation, as is current practice in The Netherlands. The  
39  
40 140 intervention arm will undergo a POC troponin T measurement. If the POC troponin T is negative (<40  
41  
42 141 ng/L), the care for the patient will be transferred to the general practitioner. The general practitioner  
43  
44 142 will further evaluate the symptoms with focus on other non-cardiac causes of the chest pain. In order  
45  
46 143 to ensure the safety of this trial, a Data Safety and Monitoring Board (DSMB) has been assigned.  
47  
48 144 Furthermore, the study will be independently monitored by the Radboudumc technology center for  
49  
50 145 clinical studies according to Good Clinical Practice (GCP).

51  
52 146 *In- and exclusion criteria [table 1]*

53  
54 147 Patients are eligible if they are 18 years or older, are suspected of a NSTEMI-ACS, have symptom  
55  
56 148 duration of at least two hours and have a modified HEAR(T) score of  $\leq 3$ . Patients are not eligible if  
57  
58 149 they are suspected of another diagnosis requiring evaluation at the ED or if they are unable to be  
59  
60 150 fully informed about the trial, e.g. in case of a language barrier or cognitive impairment.

61  
62 151 *Modified HEART score [figure 3]*

1  
2  
3 152 In the ARTICA trial a modified HEART score is used. This modification is based on the inclusion of a  
4  
5 153 POC troponin T measurement. Furthermore, when patients are screened for eligibility, only the H, E,  
6  
7 154 A and R components of the HEART score are evaluated. The HEAR score is turned into a HEART score  
8  
9 155 either by POC troponin T measurement in the ambulance, or by high-sensitive troponin T  
10  
11 156 measurement in the ED as part of standard care.

#### 12 157 *Point-of-care troponin T*

13  
14  
15 158 For the POC troponin T measurement, the Roche cobas h232 is used. The detection limit is 40-2000  
16  
17 159 ng/L. According to Roche, the measurement should be performed in a temperature of 18-32 °C and a  
18  
19 160 relative humidity of 10-80%.<sup>21</sup> Blood is obtained in a heparinized tube by venipuncture or venous  
20  
21 161 line. Using a Roche Cardiac pipette, 150 µL of blood is applied to the POC troponin T testing strip,  
22  
23 162 after inserting the testing strip in the cobas h232 POC system. After 14 minutes, the results are  
24  
25 163 available.

#### 26 164 *Follow-up*

27  
28 165 Follow-up will be performed by phone after thirty days, six months and twelve months. All potential  
29  
30 166 events, including hospital admissions, will be verified by review of medical record. Since the primary  
31  
32 167 aim in this study is to assess the cost effectiveness of the pre-hospital rule-out strategy, all health  
33  
34 168 care resources utilized by the patients will be collected in both arms.

#### 35 36 169 *Patient involvement*

37  
38 170 During the development of the study protocol, a participant of “Harteraad”, a patient advisory  
39  
40 171 council for patients with cardiovascular disease, was involved.

#### 41 42 172 *Study endpoints and cost effectiveness analysis*

43  
44  
45 173 The primary outcome is health care costs at 30 days. This economic evaluation investigates the cost-  
46  
47 174 effectiveness of full implementation of a pre-hospital rule-out strategy compared to the standard  
48  
49 175 transfer to the hospital to rule out ACS. This will be done from a societal perspective. The empirical  
50  
51 176 cost effectiveness analysis (CEA) timeframe will adhere to the follow-up scheme of the secondary  
52  
53 177 endpoint, being thirty days, six months and twelve months. Cost and quality adjusted life years  
54  
55 178 (QALYs) will be measured on a per patient basis over the relevant time path in which the (most  
56  
57 179 important) differences between both arms manifest themselves. The design of the economic  
58  
59 180 evaluation follows the principles of a cost-utility analysis and adheres to the most recent Dutch  
60  
181 guidelines for performing economic evaluations in health care.<sup>22</sup> For reporting, the CHEERS checklist  
182  
will be used where relevant.<sup>23</sup> Cost-effectiveness will be expressed in terms of costs per QALY gained.

1  
2  
3 183 Quality of the health status of the patients is measured with a validated health-related quality of life  
4 184 (HRQoL) instrument, the EuroQol-5D (EQ-5D-5L). This HRQoL instrument will be completed by the  
5 185 patients and is available in a validated Dutch translation.<sup>24</sup> The EQ-5D is a generic HRQoL instrument  
6 186 comprising five domains: mobility, self-care, usual activities, pain/discomfort and anxiety/depression.  
7  
8 187 To assess productivity losses associated with chest pain, the Institute for Medical Technology  
9 188 Assessment Productivity Cost Questionnaire (iMTA PCQ) will be used.<sup>25</sup> Uncertainty will be dealt with  
10 189 by one-way sensitivity analysis (deterministic) and by parametric statistics ultimately presenting cost-  
11 190 effectiveness acceptability curves. To ensure the quality of the economic evaluations, the  
12 191 Radboudumc Technology Center Health Economics will be involved. Secondary endpoints will  
13 192 determine the safety of the early rule-out strategy at 30 days, six months and twelve months, by  
14 193 determining the incidence of MACE. MACE is defined as acute coronary syndrome (ACS), unplanned  
15 194 revascularization and all cause death. Subgroup analyses will be performed according to gender,  
16 195 assessment of the HEART score by paramedics or cardiologists, diabetic status and female-specific  
17 196 risk factors.

#### 197 *Sample size calculation*

198 The cost of hospital treatment is determined by the Dutch *Diagnose Behandel Combinatie (DBC)*  
199 hospital reimbursement system and the *DBC* information system, similar to the international  
200 diagnosis related groupings system (DRG).<sup>26</sup> When discharged from the ED after a negative  
201 evaluation for ACS, 50% will undergo further outpatient evaluation. This percentage and the  
202 percentages of further diagnostic testing (echocardiography and treadmill: 30%, non-invasive  
203 ischemia detection: 10% and coronary angiography: 5%) are all based on the 2017 DBC  
204 administration in the Radboudumc. In the pre-hospital rule out group, cost prices for diagnostics by  
205 the cardiologist (e.g. non-invasive ischemia detection and coronary angiography) are included, even  
206 when the probability of undergoing these tests is low. Based on the aforementioned percentages ,  
207 the cost difference between both groups is estimated to be € 507. For the primary outcome we  
208 assume a small effect size (0,2) and equal standard deviations in both arms of the trial. Group sample  
209 sizes of 392 and 392 achieve 80% power to detect the difference of € 507 between both groups with  
210 a significance level (alpha) of 0,05 using a two-sided two-sample t-test. To compensate for any loss of  
211 follow-up, the sample size is enlarged by 10% to a total of 866 patients. The estimated inclusion rate  
212 will be one patient per day.

#### 213 **Discussion**

1  
2  
3 214 The majority of patients suspected of a non ST-segment elevation acute coronary syndrome (NSTE-  
4 215 ACS) is currently presented at emergency departments (ED) to rule out an ACS. EDs are increasingly  
5 216 overcrowded and ambulance services are confronted with more patient transfers. However, in low-  
6 217 risk patients an ACS is rarely found.<sup>10</sup>  
9

### 10 218 *Cost-effectiveness*

11  
12  
13 219 Health care costs are increasing because of multiple factors, such as increases in health care service  
14 220 price and intensity, population growth and aging.<sup>7</sup> Low-risk patients suspected of a NSTE-ACS often  
15 221 require an overnight stay in the hospital to undergo additional stress testing and imaging, but are not  
16 222 likely to benefit from additional testing.<sup>8</sup> In the year 2018 in the Netherlands, over one-fourth of the  
17 223 patients who were evaluated for chest pain and eventually discharged with benign non-cardiac chest  
18 224 pain were admitted to the hospital for at least one day. The average price for these admissions was €  
19 225 1.355 in 2018 and is € 1.410 in 2019, while it was € 1.220 in 2012.<sup>5</sup> The price for visiting the general  
20 226 practitioner (GP) for 5-20 minutes is € 9,97 during working hours and € 117,50 after working hours.  
21 227 However, it remains unclear how often the GPs will order additional tests or refer the patients to the  
22 228 ED or outpatient clinic, after a NSTE-ACS has been ruled out in the ambulance. Furthermore, the  
23 229 health care resource consumption in these patients represents the degree of reassurance in patients  
24 230 and in health care professionals (e.g. the general practitioner).  
33

### 34 231 *The pre-hospital HEART score*

35 232 Recent studies have shown the safety of identifying low-risk chest pain patients in a pre-hospital  
36 233 environment.<sup>19, 20</sup> The FAMOUS triage study group has demonstrated that identifying low-risk chest  
37 234 pain patients by ambulance staff using a modified HEART score is feasible and safe when using a  
38 235 high-sensitive troponin T measurement in the hospital laboratory.<sup>19</sup> They have also shown that using  
39 236 a point of care (POC) troponin T measurement to turn the HEAR score into the HEART score in the  
40 237 pre-hospital setting has important additional predictive value.<sup>27</sup> Furthermore, they have shown that  
41 238 in patients suspected of NSTE-ACS, HEART score assessment using a POC troponin T measurement by  
42 239 ambulance paramedics is accurate in identifying low-risk patients.<sup>20</sup>  
48

### 49 240 *POC troponin T*

50  
51  
52 241 The POC troponin T measured with the Roche cobas h232 yields very good analytical concordance  
53 242 with high sensitive troponin T.<sup>28</sup> This POC-test can be used as a bedside test with a fast turn-around  
54 243 time (<15 minutes) and was also used by the FAMOUS triage study group. The POC troponin T test  
55 244 has already shown to have a high predictive value for mortality in high-risk patient.<sup>29</sup>  
59

### 60 245 *The general practitioner*

1  
2  
3 246 In the Netherlands, the GP is a gatekeeper to hospital- and specialist care. GPs offer out-of-hour  
4  
5 247 services by GP cooperatives across the whole country.<sup>30</sup> Therefore, implementation of a rule-out  
6  
7 248 strategy for NSTEMI-ACS in the ambulance is possible, without leaving the patients to fend for  
8  
9 249 themselves when they are not transferred to the ED.

## 10 250 **Conclusion**

11  
12  
13 251 The ARTICA trial is the first randomized trial on cost-effectiveness of an early rule-out strategy for  
14  
15 252 low-risk patients suspected of an acute coronary syndrome, using a point-of-care troponin  
16  
17 253 measurement outside the hospital setting. The results of this study are expected to have a major  
18  
19 254 impact on the healthcare organization of chest pain patients.

## 20 255 **Ethics and dissemination**

21  
22  
23 256 This trial has been accepted by the Medical Research Ethics Committee region Arnhem-Nijmegen.  
24  
25 257 The results of this trial will be disseminated in one main paper and in additional papers with pre-  
26  
27 258 defined subgroup analyses.

## 28 259 **Funding**

29  
30  
31 260 The study is supported by ZonMw, grant number 852001942.

## 32 261 **Conflict of interest**

33  
34  
35 262 The authors declare no conflict of interest.

## 36 263 **Authors' contributions**

37  
38  
39 264 During the development of the study protocol, prof N. van Royen, C. Camaro and G.W.A. Aarts  
40  
41 265 contributed equally. The other authors provided advice and comments.

## 42 266 **References**

- 43  
44  
45  
46  
47  
48 267 1. Ibanez B, James S, Agewall S, et al. 2017 ESC Guidelines for the management of acute  
49 268 myocardial infarction in patients presenting with ST-segment elevation. *Rev Esp Cardiol (Engl Ed)*  
50 269 2017; 70: 1082. 2017/12/05. DOI: 10.1016/j.rec.2017.11.010.  
51  
52 270 2. Roffi M, Patrono C, Collet JP, et al. 2015 ESC Guidelines for the Management of Acute  
53 271 Coronary Syndromes in Patients Presenting Without Persistent ST-segment Elevation. *Rev Esp Cardiol*  
54 272 *(Engl Ed)* 2015; 68: 1125. 2015/12/18. DOI: 10.1016/j.rec.2015.10.009.  
55 273 3. Allen BR, Simpson GG, Zeinali I, et al. Incorporation of the HEART Score Into a Low-risk Chest  
56 274 Pain Pathway to Safely Decrease Admissions. *Crit Pathw Cardiol* 2018; 17: 184-190. 2018/11/13. DOI:  
57 275 10.1097/HPC.000000000000155.

- 276 4. Authority DH. Marktscan Acute Zorg.  
277 <https://www.rijksoverheid.nl/documenten/rapporten/2017/09/11/rapport-marktscan-acute-zorg>  
278 2017.
- 279 5. Authority DH. Open data DBC information system (DIS), <http://www.opendatadis.nl>.
- 280 6. Sun BC, Hsia RY, Weiss RE, et al. Effect of emergency department crowding on outcomes of  
281 admitted patients. *Ann Emerg Med* 2013; 61: 605-611 e606. 2012/12/12. DOI:  
282 10.1016/j.annemergmed.2012.10.026.
- 283 7. Dieleman JL, Squires E, Bui AL, et al. Factors Associated With Increases in US Health Care  
284 Spending, 1996-2013. *JAMA* 2017; 318: 1668-1678. 2017/11/09. DOI: 10.1001/jama.2017.15927.
- 285 8. Mahler SA, Hiestand BC, Goff DC, Jr., et al. Can the HEART score safely reduce stress testing  
286 and cardiac imaging in patients at low risk for major adverse cardiac events? *Crit Pathw Cardiol* 2011;  
287 10: 128-133. 2011/10/13. DOI: 10.1097/HPC.0b013e3182315a85.
- 288 9. Poldervaart JM, Reitsma JB, Backus BE, et al. Effect of Using the HEART Score in Patients With  
289 Chest Pain in the Emergency Department: A Stepped-Wedge, Cluster Randomized Trial. *Ann Intern*  
290 *Med* 2017; 166: 689-697. 2017/04/25. DOI: 10.7326/M16-1600.
- 291 10. Nasrallah N, Steiner H and Hasin Y. The challenge of chest pain in the emergency room: now  
292 and the future. *Eur Heart J* 2011; 32: 656. 2011/04/28.
- 293 11. Riley RF, Miller CD, Russell GB, et al. Cost analysis of the History, ECG, Age, Risk factors, and  
294 initial Troponin (HEART) Pathway randomized control trial. *Am J Emerg Med* 2017; 35: 77-81.  
295 2016/10/22. DOI: 10.1016/j.ajem.2016.10.005.
- 296 12. Six AJ, Cullen L, Backus BE, et al. The HEART score for the assessment of patients with chest  
297 pain in the emergency department: a multinational validation study. *Crit Pathw Cardiol* 2013; 12:  
298 121-126. 2013/07/31. DOI: 10.1097/HPC.0b013e31828b327e.
- 299 13. Six AJ, Backus BE and Kelder JC. Chest pain in the emergency room: value of the HEART score.  
300 *Neth Heart J* 2008; 16: 191-196. 2008/07/31.
- 301 14. Backus BE, Six AJ, Kelder JC, et al. Chest pain in the emergency room: a multicenter validation  
302 of the HEART Score. *Crit Pathw Cardiol* 2010; 9: 164-169. 2010/08/31. DOI:  
303 10.1097/HPC.0b013e3181ec36d8.
- 304 15. Backus BE, Six AJ, Kelder JC, et al. A prospective validation of the HEART score for chest pain  
305 patients at the emergency department. *Int J Cardiol* 2013; 168: 2153-2158. 2013/03/08. DOI:  
306 10.1016/j.ijcard.2013.01.255.
- 307 16. Laureano-Phillips J, Robinson RD, Aryal S, et al. HEART Score Risk Stratification of Low-Risk  
308 Chest Pain Patients in the Emergency Department: A Systematic Review and Meta-Analysis. *Ann*  
309 *Emerg Med* 2019 2019/02/06. DOI: 10.1016/j.annemergmed.2018.12.010.
- 310 17. Mahler SA, Riley RF, Hiestand BC, et al. The HEART Pathway randomized trial: identifying  
311 emergency department patients with acute chest pain for early discharge. *Circ Cardiovasc Qual*  
312 *Outcomes* 2015; 8: 195-203. 2015/03/05. DOI: 10.1161/CIRCOUTCOMES.114.001384.
- 313 18. Niven WGP, Wilson D, Goodacre S, et al. Do all HEART Scores beat the same: evaluating the  
314 interoperator reliability of the HEART Score. *Emerg Med J* 2018; 35: 732-738. 2018/09/16. DOI:  
315 10.1136/emered-2018-207540.
- 316 19. Ishak M, Ali D, Fokkert MJ, et al. Fast assessment and management of chest pain patients  
317 without ST-elevation in the pre-hospital gateway (FamouS Triage): ruling out a myocardial infarction  
318 at home with the modified HEART score. *Eur Heart J Acute Cardiovasc Care* 2018; 7: 102-110.  
319 2017/01/14. DOI: 10.1177/2048872616687116.
- 320 20. van Dongen DN, Tolsma RT, Fokkert MJ, et al. Pre-hospital risk assessment in suspected non-  
321 ST-elevation acute coronary syndrome: A prospective observational study. *Eur Heart J Acute*  
322 *Cardiovasc Care* 2018: 2048872618813846. 2018/11/24. DOI: 10.1177/2048872618813846.
- 323 21. Diagnostics R. Roche CARDIAC POC Troponin T Method Sheet. <http://diagnosticsroche.com>  
324 2019.
- 325 22. Institute NHC. Guideline for economic evaluations in healthcare.  
326 [https://englishzorginstituutnederland.nl/publications/reports/2016/06/16/guideline-for-economic-](https://englishzorginstituutnederland.nl/publications/reports/2016/06/16/guideline-for-economic-evaluations-in-healthcare)  
327 [evaluations-in-healthcare](https://englishzorginstituutnederland.nl/publications/reports/2016/06/16/guideline-for-economic-evaluations-in-healthcare) 2016.

- 1  
2  
3 328 23. Husereau D, Drummond M, Petrou S, et al. Consolidated Health Economic Evaluation  
4 329 Reporting Standards (CHEERS) statement. *Value Health* 2013; 16: e1-5. 2013/03/30. DOI:  
5 330 10.1016/j.jval.2013.02.010.  
6 331 24. M MV, K MV, S MAAE, et al. Dutch Tariff for the Five-Level Version of EQ-5D. *Value Health*  
7 332 2016; 19: 343-352. 2016/06/22. DOI: 10.1016/j.jval.2016.01.003.  
8 333 25. Bouwmans C, Krol M, Severens H, et al. The iMTA Productivity Cost Questionnaire: A  
9 334 Standardized Instrument for Measuring and Valuing Health-Related Productivity Losses. *Value Health*  
10 335 2015; 18: 753-758. 2015/09/28. DOI: 10.1016/j.jval.2015.05.009.  
11 336 26. Schreyogg J, Stargardt T, Tiemann O, et al. Methods to determine reimbursement rates for  
12 337 diagnosis related groups (DRG): a comparison of nine European countries. *Health Care Manag Sci*  
13 338 2006; 9: 215-223. 2006/10/05.  
14 339 27. van Dongen DN, Fokkert MJ, Tolsma RT, et al. Value of Prehospital Troponin Assessment in  
15 340 Suspected Non-ST-Elevation Acute Coronary Syndrome. *Am J Cardiol* 2018; 122: 1610-1616.  
16 341 2018/09/29. DOI: 10.1016/j.amjcard.2018.07.037.  
17 342 28. Jungbauer C, Hupf J, Giannitsis E, et al. Analytical and Clinical Validation of a Point-of-Care  
18 343 Cardiac Troponin T Test with an Improved Detection Limit. *Clin Lab* 2017; 63: 633-645. 2017/04/12.  
19 344 DOI: 10.7754/Clin.Lab.2016.160814.  
20 345 29. Rasmussen MB, Stengaard C, Sorensen JT, et al. Predictive value of routine point-of-care  
21 346 cardiac troponin T measurement for prehospital diagnosis and risk-stratification in patients with  
22 347 suspected acute myocardial infarction. *Eur Heart J Acute Cardiovasc Care* 2017: 2048872617745893.  
23 348 2017/12/05. DOI: 10.1177/2048872617745893.  
24 349 30. Faber MJ, Burgers JS and Westert GP. A sustainable primary care system: lessons from the  
25 350 Netherlands. *J Ambul Care Manage* 2012; 35: 174-181. 2012/06/07. DOI:  
26 351 10.1097/JAC.0b013e31823e83a4.

32  
33  
34  
35  
36  
37  
38  
39  
40  
41  
42  
43  
44  
45  
46  
47  
48  
49  
50  
51  
52  
53  
54  
55  
56  
57  
58  
59  
60

| Inclusion criteria                                                                                                                                                                                                                                                | Exclusion criteria                                                                                                                                                                                                                                                                                                                                                                                                                                                                                                                                                                                                                                                                                                                                                                                                                                                                                                                                                                                                                                                                                                                                                                                                                                                                                                |
|-------------------------------------------------------------------------------------------------------------------------------------------------------------------------------------------------------------------------------------------------------------------|-------------------------------------------------------------------------------------------------------------------------------------------------------------------------------------------------------------------------------------------------------------------------------------------------------------------------------------------------------------------------------------------------------------------------------------------------------------------------------------------------------------------------------------------------------------------------------------------------------------------------------------------------------------------------------------------------------------------------------------------------------------------------------------------------------------------------------------------------------------------------------------------------------------------------------------------------------------------------------------------------------------------------------------------------------------------------------------------------------------------------------------------------------------------------------------------------------------------------------------------------------------------------------------------------------------------|
| <ul style="list-style-type: none"><li>- Age <math>\geq</math> 18 years</li><li>- Suspected NSTEMI-ACS</li><li>- Symptom duration of at least two hours</li><li>- Modified HEAR(T) score <math>\leq</math> 3</li><li>- Provided written informed consent</li></ul> | <ul style="list-style-type: none"><li>- ST-segment elevation</li><li>- Suspected non-cardiac cause of the symptoms requiring evaluation at the emergency department</li><li>- Comatose state, defined as an GCS <math>&lt;</math> 8</li><li>- Known cognitive impairment</li><li>- Pregnancy</li><li>- Cardiogenic shock, defined as systolic blood pressure <math>&lt;</math>90 mmHg, heart rate <math>&gt;</math> 100 bpm and peripheral oxygen saturation <math>&lt;</math>90%</li><li>- Syncope</li><li>- Signs of heart failure</li><li>- Heart rhythm disorders and second or third degree atrioventricular block</li><li>- Known end-stage renal disease (dialysis and/or MDRD <math>&lt;</math> 30 ml/min)</li><li>- Suspected aortic dissection or pulmonary embolism</li><li>- Confirmed AMI, PCI or CABG <math>&lt;</math>30 days prior to inclusion</li><li>- Communication issues with the patient and/or language barrier</li><li>- Decision of a present general practitioner to evaluate the patient at the emergency department</li><li>- Decision of the consultant cardiologist to evaluate the patient at the emergency department</li><li>- Any significant medical or mental condition, which in the investigator's opinion may interfere with optimal participation in the study</li></ul> |



# HEART

## HEART score for chest pain patients

|                                       |                                                               |              |  |
|---------------------------------------|---------------------------------------------------------------|--------------|--|
| <b><u>H</u>istory<br/>(Anamnesis)</b> | Highly suspicious                                             | 2            |  |
|                                       | Moderately suspicious                                         | 1            |  |
|                                       | Slightly suspicious                                           | 0            |  |
| <b><u>E</u>CG</b>                     | Significant ST-deviation                                      | 2            |  |
|                                       | Non-specific repolarisation disturbance / LBBB / PM           | 1            |  |
|                                       | Normal                                                        | 0            |  |
| <b><u>A</u>ge</b>                     | ≥ 65 years                                                    | 2            |  |
|                                       | 45 – 65 years                                                 | 1            |  |
|                                       | ≤ 45 years                                                    | 0            |  |
| <b><u>R</u>isk factors</b>            | ≥ 3 risk factors <i>or</i> history of atherosclerotic disease | 2            |  |
|                                       | 1 or 2 risk factors                                           | 1            |  |
|                                       | No risk factors known                                         | 0            |  |
| <b><u>T</u>roponin</b>                | ≥ 3x normal limit                                             | 2            |  |
|                                       | 1-3x normal limit                                             | 1            |  |
|                                       | ≤ normal limit                                                | 0            |  |
|                                       |                                                               | <b>Total</b> |  |

### Risk factors for atherosclerotic disease:

Hypercholesterolemia

Cigarette smoking

Hypertension

Positive family history

Diabetes Mellitus

Obesity (BMI&gt;30)

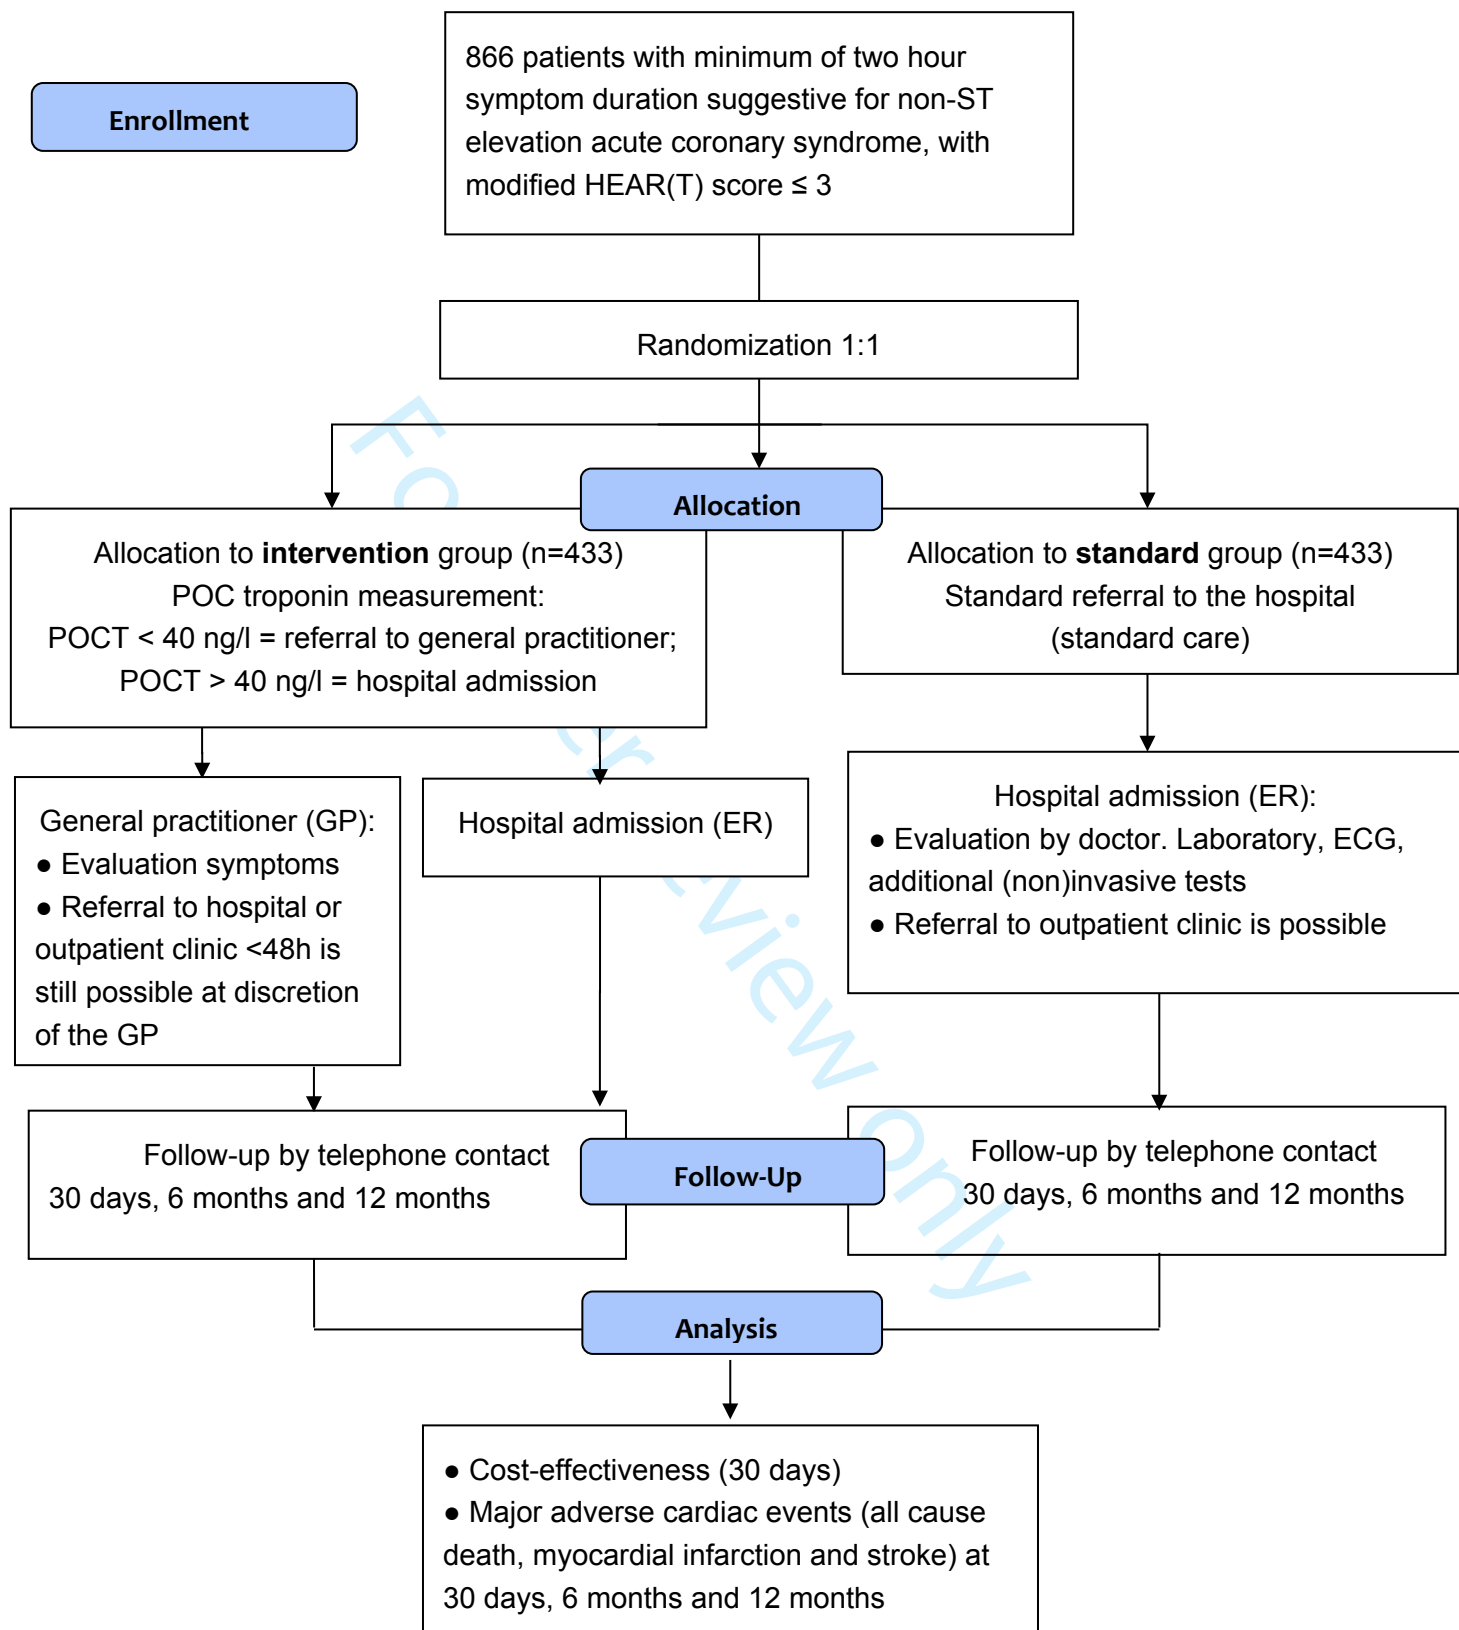



# ARTICA

RANDOMIZED TRIAL

## Modified HEART Score

|                                                                                                                                                                                                                                                            |                                                                     |          |
|------------------------------------------------------------------------------------------------------------------------------------------------------------------------------------------------------------------------------------------------------------|---------------------------------------------------------------------|----------|
| <b>History</b>                                                                                                                                                                                                                                             | <b>Highly suspicious</b>                                            | <b>2</b> |
|                                                                                                                                                                                                                                                            | <b>Moderately suspicious</b>                                        | <b>1</b> |
|                                                                                                                                                                                                                                                            | <b>Slightly suspicious</b>                                          | <b>0</b> |
| <b>ECG</b>                                                                                                                                                                                                                                                 | <b>Significant ST-segment depression</b>                            | <b>2</b> |
|                                                                                                                                                                                                                                                            | <b>Non specific repolarization disturbance</b>                      | <b>1</b> |
|                                                                                                                                                                                                                                                            | <b>LBBB or PM</b>                                                   | <b>1</b> |
|                                                                                                                                                                                                                                                            | <b>Normal</b>                                                       | <b>0</b> |
| <b>Age</b>                                                                                                                                                                                                                                                 | <b>≥65 years</b>                                                    | <b>2</b> |
|                                                                                                                                                                                                                                                            | <b>45-65 years</b>                                                  | <b>1</b> |
|                                                                                                                                                                                                                                                            | <b>&lt;45 years</b>                                                 | <b>0</b> |
| <b>Risk factors</b>                                                                                                                                                                                                                                        | <b>≥3 risk factors <i>OR</i> history of atherosclerotic disease</b> | <b>2</b> |
|                                                                                                                                                                                                                                                            | <b>1 or 2 risk factors</b>                                          | <b>1</b> |
|                                                                                                                                                                                                                                                            | <b>No risk factors</b>                                              | <b>0</b> |
| <b>Troponin T point of care</b>                                                                                                                                                                                                                            | <b>&gt;60 ng/L</b>                                                  | <b>2</b> |
|                                                                                                                                                                                                                                                            | <b>40-60 ng/L</b>                                                   | <b>1</b> |
|                                                                                                                                                                                                                                                            | <b>&lt;40 ng/L</b>                                                  | <b>0</b> |
| <b>Risk factors:</b> <ul style="list-style-type: none"> <li>• Smoking</li> <li>• Hypertension</li> <li>• Diabetes mellitus</li> <li>• Obesity (BMI &gt; 30 kg/m<sup>2</sup>)</li> <li>• Hypercholesterolemia</li> <li>• Positive family history</li> </ul> |                                                                     |          |

# BMJ Open

## Acute rule out of non ST-segment elevation acute coronary syndrome in the (pre)hospital setting by HEART score assessment and a single point of care troponin: Rationale and design of the ARTICA randomized trial.

|                                 |                                                                                                                                                                                                                                                                                                                                                                                                                                                                                                                                                                                                                                                                      |
|---------------------------------|----------------------------------------------------------------------------------------------------------------------------------------------------------------------------------------------------------------------------------------------------------------------------------------------------------------------------------------------------------------------------------------------------------------------------------------------------------------------------------------------------------------------------------------------------------------------------------------------------------------------------------------------------------------------|
| Journal:                        | <i>BMJ Open</i>                                                                                                                                                                                                                                                                                                                                                                                                                                                                                                                                                                                                                                                      |
| Manuscript ID                   | bmjopen-2019-034403.R1                                                                                                                                                                                                                                                                                                                                                                                                                                                                                                                                                                                                                                               |
| Article Type:                   | Protocol                                                                                                                                                                                                                                                                                                                                                                                                                                                                                                                                                                                                                                                             |
| Date Submitted by the Author:   | 19-Dec-2019                                                                                                                                                                                                                                                                                                                                                                                                                                                                                                                                                                                                                                                          |
| Complete List of Authors:       | Aarts, Goaris; Radboudumc, Cardiology<br>Camaro, Cyril; Radboudumc, Cardiology<br>van Geuns, Robert-Jan; Radboudumc, Cardiology<br>Cramer, Etienne; Radboudumc, Cardiology<br>van Kimmenade, Roland; Radboudumc, Cardiology<br>Damman, P.; Radboudumc, Cardiology<br>van Grunsven, Pierre; Ambulancezorg Gelderland-Zuid<br>Adang, Eddy; Radboudumc, Health Evidence<br>Giesen, Paul; Radboudumc, Scientific Institute for Quality of Healthcare<br>Rutten, Martijn; Radboudumc, Scientific Institute for Quality of Healthcare<br>Ouwendijk, Olaf; Huisartsenpost Nijmegen<br>Gomes, Marc; Canisius Wilhelmina Hospital<br>van Royen, Niels; Radboudumc, Cardiology |
| <b>Primary Subject Heading</b>: | Emergency medicine                                                                                                                                                                                                                                                                                                                                                                                                                                                                                                                                                                                                                                                   |
| Secondary Subject Heading:      | Cardiovascular medicine, Health economics, General practice / Family practice                                                                                                                                                                                                                                                                                                                                                                                                                                                                                                                                                                                        |
| Keywords:                       | Acute coronary syndrome, Pre-hospital, Ambulance, Point-of-care troponin, modified HEART score, Cost-effectiveness                                                                                                                                                                                                                                                                                                                                                                                                                                                                                                                                                   |
|                                 |                                                                                                                                                                                                                                                                                                                                                                                                                                                                                                                                                                                                                                                                      |

SCHOLARONE™  
Manuscripts



I, the Submitting Author has the right to grant and does grant on behalf of all authors of the Work (as defined in the below author licence), an exclusive licence and/or a non-exclusive licence for contributions from authors who are: i) UK Crown employees; ii) where BMJ has agreed a CC-BY licence shall apply, and/or iii) in accordance with the terms applicable for US Federal Government officers or employees acting as part of their official duties; on a worldwide, perpetual, irrevocable, royalty-free basis to BMJ Publishing Group Ltd ("BMJ") its licensees and where the relevant Journal is co-owned by BMJ to the co-owners of the Journal, to publish the Work in this journal and any other BMJ products and to exploit all rights, as set out in our [licence](#).

The Submitting Author accepts and understands that any supply made under these terms is made by BMJ to the Submitting Author unless you are acting as an employee on behalf of your employer or a postgraduate student of an affiliated institution which is paying any applicable article publishing charge ("APC") for Open Access articles. Where the Submitting Author wishes to make the Work available on an Open Access basis (and intends to pay the relevant APC), the terms of reuse of such Open Access shall be governed by a Creative Commons licence – details of these licences and which [Creative Commons](#) licence will apply to this Work are set out in our licence referred to above.

Other than as permitted in any relevant BMJ Author's Self Archiving Policies, I confirm this Work has not been accepted for publication elsewhere, is not being considered for publication elsewhere and does not duplicate material already published. I confirm all authors consent to publication of this Work and authorise the granting of this licence.

1  
2  
3 **1 Acute rule out of non ST-segment elevation acute coronary syndrome in the**  
4 **(pre)hospital setting by HEART score assessment and a single point of care**  
5  
6 **2**  
7 **3 troponin: Rationale and design of the ARTICA randomized trial.**  
8  
9

10 **4 Authors**  
11

12  
13 5 G.W.A. Aarts, MD  
14 6 Radboudumc, department of Cardiology  
15 7 [Joris.Aarts@radboudumc.nl](mailto:Joris.Aarts@radboudumc.nl)  
16

17  
18 8 C. Camaro, MD  
19 9 Radboudumc, department of Cardiology  
20 10 [Cyril.Camaro@radboudumc.nl](mailto:Cyril.Camaro@radboudumc.nl)  
21

22  
23 11 Prof R.J.M. van Geuns, MD, PhD  
24 12 Radboudumc, department of Cardiology  
25 13 [RobertJan.vanGeuns@radboudumc.nl](mailto:RobertJan.vanGeuns@radboudumc.nl)  
26

27  
28 14 G.E. Cramer, MD  
29 15 Radboudumc, department of Cardiology  
30 16 [Etienne.Cramer@radboudumc.nl](mailto:Etienne.Cramer@radboudumc.nl)  
31

32  
33 17 R.R.J. van Kimmenade, MD, PhD  
34 18 Radboudumc, department of Cardiology  
35 19 [Roland.vanKimmenade@radboudumc.nl](mailto:Roland.vanKimmenade@radboudumc.nl)  
36

37  
38 20 P. Damman, MD, PhD  
39 21 Radboudumc, department of Cardiology  
40 22 [Peter.Damman@radboudumc.nl](mailto:Peter.Damman@radboudumc.nl)  
41

42  
43 23 P.M. van Grunsven, MD, PhD  
44 24 Ambulancezorg Gelderland Zuid  
45 25 [Pierre.van.Grunsvan@vrgz.nl](mailto:Pierre.van.Grunsvan@vrgz.nl)  
46

47  
48 26 E.M.M. Adang, PhD  
49 27 Radboudumc, department for Health Evidence  
50 28 [Eddy.Adang@radboudumc.nl](mailto:Eddy.Adang@radboudumc.nl)  
51

52  
53 29 P.H.J. Giesen, MD, PhD  
54 30 IQ Healthcare  
55 31 [Paul.Giesen@radboudumc.nl](mailto:Paul.Giesen@radboudumc.nl)  
56

57  
58 32 M. Rutten, MD, PhD  
59 33 IQ Healthcare  
60 34 [Martijn.Rutten@radboudumc.nl](mailto:Martijn.Rutten@radboudumc.nl)

1  
2  
3  
4  
5  
6  
7  
8  
9  
10  
11  
12  
13  
14  
15  
16  
17  
18  
19  
20  
21  
22  
23  
24  
25  
26  
27  
28  
29  
30  
31  
32  
33  
34  
35  
36  
37  
38  
39  
40  
41  
42  
43  
44  
45  
46  
47  
48  
49  
50  
51  
52  
53  
54  
55  
56  
57  
58  
59  
60

35 O. Ouwendijk, MD  
36 Huisartsenpost Nijmegen  
37 [O.Ouwendijk@cihn.nl](mailto:O.Ouwendijk@cihn.nl)

38 M.E.R. Gomes, MD, PhD  
39 Canisius Wilhelmina Hospital, department of Cardiology  
40 [Marc.Gomes@cwz.nl](mailto:Marc.Gomes@cwz.nl)

41 Prof N. van Royen, MD, PhD  
42 Radboudumc, department of Cardiology  
43 [Niels.vanRoyen@radboudumc.nl](mailto:Niels.vanRoyen@radboudumc.nl)

44 **Corresponding author:**

45 Prof N. van Royen, MD, PhD  
46 Radboudumc, department of Cardiology  
47 [Niels.vanRoyen@radboudumc.nl](mailto:Niels.vanRoyen@radboudumc.nl)

For peer review only

## 48 **Abstract**

49 *Introduction:* Because of the lack of pre-hospital protocols to rule out a non-ST elevation acute  
50 coronary syndrome (NSTEMI-ACS), patients with chest pain are often transferred to the emergency  
51 department (ED) for thorough evaluation. However, in low-risk patients, an acute coronary syndrome  
52 (ACS) is rarely found, resulting in unnecessary health-care consumption. Using the HEART (History,  
53 Electrocardiogram, Age, Risk factors and Troponin) score, low-risk patients are easily identified.  
54 When a point-of-care (POC) troponin measurement is included in the HEART score, an ACS can  
55 adequately be ruled out in low-risk patients in the pre-hospital setting. However, it remains unclear  
56 whether a pre-hospital rule-out strategy using the HEART score and a POC troponin measurement in  
57 suspected NSTEMI-ACS patients is cost-effective.

58 *Methods and analysis:* The ARTICA trial is a randomized trial in which the primary objective is to  
59 investigate the cost-effectiveness after 30 days of an early rule-out strategy for low-risk patients  
60 suspected of a NSTEMI-ACS, using a modified HEART score including a POC troponin T measurement.  
61 Patients are included by ambulance paramedics and 1:1 randomized for 1) presentation at the ED  
62 (control group) or 2) POC troponin T measurement (intervention group) and transfer of the care to  
63 the general practitioner in case of a low troponin T value. In total, 866 patients will be included.  
64 Follow-up will be performed after 30 days, 6 months and 12 months.

65 *Ethics and dissemination:* This trial has been accepted by the Medical Research Ethics Committee  
66 region Arnhem-Nijmegen. The results of this trial will be disseminated in one main paper and in  
67 additional papers with subgroup analyses.

68 *Trial registration number:* Netherlands Trial Register (NL7148)

## 70 **Article summary**

### 71 *Strengths and limitations of this study*

- 72 • The ARTICA trial is the first randomized trial with a primary focus on cost-effectiveness of a  
73 pre-hospital rule-out strategy for low-risk patients suspected of an acute coronary syndrome.
- 74 • When randomized for point-of-care troponin T measurement, the ambulance paramedics  
75 can rule out an acute coronary syndrome on the spot and therefore comfort the patient  
76 without having to transfer them to the emergency department.
- 77 • The results of this study will provide important insights in the effects of ruling out an acute  
78 coronary syndrome without transfer to the hospital.
- 79 • In order to minimize the chance of miscalculation of the HEART score, the ambulance  
80 paramedics have to register every component of the HEART score digitally before inclusion in  
81 the trial.



- 1  
2  
3 82 • The point-of-care troponin T measurement used in this trial is less sensitive than the high-  
4 83 sensitive troponin T measurements in the hospital laboratory, but when combined with the  
5 84 other components of the HEART score, the sensitivity of this modified HEART score is still  
6 85 high.  
7  
8  
9

10 86

11  
12  
13 87 **Keywords**

14  
15 88 Acute coronary syndrome, pre-hospital, ambulance, point-of-care troponin, modified HEART score,  
16 89 cost-effectiveness  
17  
18  
19  
20  
21  
22  
23  
24  
25  
26  
27  
28  
29  
30  
31  
32  
33  
34  
35  
36  
37  
38  
39  
40  
41  
42  
43  
44  
45  
46  
47  
48  
49  
50  
51  
52  
53  
54  
55  
56  
57  
58  
59  
60

## 90 Introduction

91 Acute chest pain poses a daily challenge for general practitioners and ambulance paramedics. Since  
92 ischemic heart disease is the single most common cause of death worldwide, early risk stratification  
93 is crucial.<sup>1</sup> The diagnostic foundation when an acute coronary syndrome (ACS) is suspected is a  
94 combination of a 12-lead electrocardiogram (ECG), clinical evaluation and cardiac troponin  
95 measurements.<sup>2</sup> In patients presenting with an acute ST-segment elevation myocardial infarction  
96 (STEMI), the diagnosis is relatively straightforward after obtaining an ECG. However, in more than  
97 one-third of the non-ST elevation acute coronary syndrome (NSTEMI) patients, the ECG is normal.<sup>2</sup>  
98 Hence, the vast majority of suspected ACS patients is in need of further evaluation and transferred to  
99 the emergency department (ED). Chest pain is therefore one of the most chief complaints in the ED,  
100 accounting for up to over 10% of all ED visits.<sup>3-5</sup> The number of patients visiting the ED is increasing  
101 and ED overcrowding is a global public health phenomenon, which is associated with worse patient  
102 outcomes.<sup>5-7</sup> In addition to the increasing number of patients, health care costs and health  
103 expenditure per capita are also increasing, leading to a growing demand for efficiency.<sup>8,9</sup> Only 10-  
104 20% of the chest pain patients have an ACS and in patients at low risk for ACS, a NSTEMI is rarely  
105 found.<sup>10-12</sup> Still, these ED visits often include echocardiography, additional non-invasive ischemia  
106 detection and prolonged in-hospital stay.<sup>10,13-15</sup> These empirical strategies are costly, while low-risk  
107 patients are not likely to benefit from additional testing.<sup>10,15,16</sup> A simple tool for risk stratification of  
108 chest pain patients is the HEART (History, ECG, Age, Risk factors, Troponin) score [figure 1], which is  
109 widely validated for use in the ED.<sup>17,18</sup> In the HEART score, patients can be given 0 to 10 points and  
110 patients with 0 to 3 points are at low risk for having an ACS. A recent meta-analysis showed that one-  
111 third of the patients presenting with chest pain have a HEART score of 0 to 3, with a risk of 1.9% of  
112 developing short-term (30 days to 6 weeks) major adverse cardiac events (MACE).<sup>19</sup> The risk of MACE  
113 is even lower, 0.8%, when a modified low-risk HEART score is used, in which patients with a HEART  
114 score of 0 to 3 are only classified as low-risk patients if the troponin value is below the 99<sup>th</sup>  
115 percentile.<sup>19</sup> Implementation of the HEART Pathway, a protocol in which early discharge from the ED  
116 without further testing is recommended in low-risk patients, resulted in significant cost savings  
117 without any MACE in the discharged patients.<sup>16,20</sup> The HEART score has proven to have a high degree  
118 of reproducibility and an excellent inter-operator agreement in both nurses and doctors.<sup>21</sup> The  
119 FAMOUS triage study group has demonstrated that HEART score assessment by ambulance  
120 paramedics is feasible and safe.<sup>22</sup> Moreover, ambulance paramedics can adequately assess a  
121 complete HEART score, using a point-of-care (POC) troponin T measurement.<sup>23</sup> Thus, pre-hospital  
122 triage of patients suspected of a NSTEMI is possible. The cost-effectiveness of this pre-hospital  
123 strategy has not been investigated yet. Therefore, it remains unclear whether identification of low-

1  
2  
3 124 risk patients presenting with chest pain in the pre-hospital setting and accordingly not transferring  
4  
5 125 them to the ED will lead to a reduction in health care costs. The aim of the ARTICA trial is to assess  
6  
7 126 the cost-effectiveness of rule-out of a NSTEMI-ACS in low-risk patients in the pre-hospital setting.  
8

## 9 127 **Methods and Analysis**

### 10 11 128 *Objectives*

12  
13  
14 129 The primary objective of the ARTICA trial is to investigate the cost-effectiveness, assessed by health  
15  
16 130 care costs after 30 days, of a pre-hospital rule-out strategy for low-risk patients suspected of a NSTEMI-  
17  
18 131 ACS, using a modified HEART score and a POC troponin T measurement, compared with standard  
19  
20 132 transfer to the ED. The secondary objective is to determine safety of this pre-hospital rule-out  
21  
22 133 strategy, defined as the incidence of MACE.

### 23 134 *Design and population*

24  
25  
26 135 The ARTICA trial is a randomized, investigator-initiated, multi-center study. Patients with possible  
27  
28 136 ACS are screened for eligibility by trained ambulance paramedics [figure 2]. The patients are  
29  
30 137 screened using the Castor Electronic Data Capture (Castor EDC) platform, in which the ambulance  
31  
32 138 paramedics register every aspect of the HEART score (the HEART score without the Troponin  
33  
34 139 component) and the in- and exclusion criteria in order to check for eligibility. The paramedics are  
35  
36 140 able to send the ECG to a cardiologist digitally, in case of doubt. After being informed by the  
37  
38 141 ambulance professional and having provided written consent, the patients will be subjected to a  
39  
40 142 digital 1:1 randomization in Castor EDC. The standard care arm will be transferred to the ED for  
41  
42 143 further evaluation, as is current practice in The Netherlands. The intervention arm will undergo a  
43  
44 144 POC troponin T measurement. If the POC troponin T is negative (<40 ng/L), the care for the patient  
45  
46 145 will be transferred to the general practitioner. The general practitioner will further evaluate the  
47  
48 146 symptoms with focus on other non-cardiac causes of the chest pain. If the POC troponin T is elevated  
49  
50 147 ( $\geq 40$  ng/L), the patient will be transferred to the ED, even if the total HEART score is less than or  
51  
52 148 equal to 3. In order to ensure the safety of this trial, a Data Safety and Monitoring Board (DSMB) has  
53  
54 149 been assigned. Furthermore, the study will be independently monitored by the Radboudumc  
55  
56 150 technology center for clinical studies according to Good Clinical Practice (GCP).

### 53 151 *In- and exclusion criteria [table 1]*

| Inclusion criteria                                                                                                 | Exclusion criteria                                                                                                     |
|--------------------------------------------------------------------------------------------------------------------|------------------------------------------------------------------------------------------------------------------------|
| <ul style="list-style-type: none"> <li>- Age <math>\geq 18</math> years</li> <li>- Suspected NSTEMI-ACS</li> </ul> | <ul style="list-style-type: none"> <li>- ST-segment elevation</li> <li>- Suspected non-cardiac cause of the</li> </ul> |

1  
2  
3  
4  
5  
6  
7  
8  
9  
10  
11  
12  
13  
14  
15  
16  
17  
18  
19  
20  
21  
22  
23  
24  
25  
26  
27  
28  
29  
30  
31  
32  
33  
34  
35  
36  
37  
38  
39  
40  
41  
42  
43  
44  
45  
46  
47  
48  
49  
50  
51  
52  
53  
54  
55  
56  
57  
58  
59  
60

|                                                                                                                                                                                               |                                                                                                                                                                                                                                                                                                                                                                                                                                                                                                                                                                                                                                                                                                                                                                                                                                                                                                                                                                                                                                                                                                                                                                                                                                                                   |
|-----------------------------------------------------------------------------------------------------------------------------------------------------------------------------------------------|-------------------------------------------------------------------------------------------------------------------------------------------------------------------------------------------------------------------------------------------------------------------------------------------------------------------------------------------------------------------------------------------------------------------------------------------------------------------------------------------------------------------------------------------------------------------------------------------------------------------------------------------------------------------------------------------------------------------------------------------------------------------------------------------------------------------------------------------------------------------------------------------------------------------------------------------------------------------------------------------------------------------------------------------------------------------------------------------------------------------------------------------------------------------------------------------------------------------------------------------------------------------|
| <ul style="list-style-type: none"> <li>- Symptom duration of at least two hours</li> <li>- Modified HEAR(T) score <math>\leq 3</math></li> <li>- Provided written informed consent</li> </ul> | <ul style="list-style-type: none"> <li>symptoms requiring evaluation at the emergency department</li> <li>- Comatose state, defined as an GCS <math>&lt; 8</math></li> <li>- Known cognitive impairment</li> <li>- Pregnancy</li> <li>- Cardiogenic shock, defined as systolic blood pressure <math>&lt; 90</math> mmHg, heart rate <math>&gt; 100</math> bpm and peripheral oxygen saturation <math>&lt; 90\%</math></li> <li>- Syncope</li> <li>- Signs of heart failure</li> <li>- Heart rhythm disorders and second or third degree atrioventricular block</li> <li>- Known end-stage renal disease (dialysis and/or MDRD <math>&lt; 30</math> ml/min)</li> <li>- Suspected aortic dissection or pulmonary embolism</li> <li>- Confirmed AMI, PCI or CABG <math>&lt; 30</math> days prior to inclusion</li> <li>- Communication issues with the patient and/or language barrier</li> <li>- Decision of a present general practitioner to evaluate the patient at the emergency department</li> <li>- Decision of the consultant cardiologist to evaluate the patient at the emergency department</li> <li>- Any significant medical or mental condition, which in the investigator's opinion may interfere with optimal participation in the study</li> </ul> |
|-----------------------------------------------------------------------------------------------------------------------------------------------------------------------------------------------|-------------------------------------------------------------------------------------------------------------------------------------------------------------------------------------------------------------------------------------------------------------------------------------------------------------------------------------------------------------------------------------------------------------------------------------------------------------------------------------------------------------------------------------------------------------------------------------------------------------------------------------------------------------------------------------------------------------------------------------------------------------------------------------------------------------------------------------------------------------------------------------------------------------------------------------------------------------------------------------------------------------------------------------------------------------------------------------------------------------------------------------------------------------------------------------------------------------------------------------------------------------------|

152 **Table 1. In- and exclusion criteria. NSTEMI-ACS = non ST-segment elevation acute coronary syndrome,**  
 153 **GCS = Glasgow Coma Scale, MDRD = Modification of Diet in Renal Disease formula, AMI = acute**  
 154 **myocardial infarction, PCI = percutaneous coronary intervention, CABG = coronary artery bypass**  
 155 **grafting**

156 Patients are eligible if they are 18 years or older, are suspected of a NSTEMI-ACS, have symptom  
 157 duration of at least two hours and have a modified HEAR score of  $\leq 3$ . Patients are not eligible if they

1  
2  
3 158 are suspected of another diagnosis requiring evaluation at the ED or if they are unable to be fully  
4  
5 159 informed about the trial, e.g. in case of a language barrier or cognitive impairment.  
6

7 160 *Modified HEART score [figure 3]*  
8

9  
10 161 In the ARTICA trial a modified HEART score is used. This modification is based on the inclusion of a  
11  
12 162 POC troponin T measurement. Furthermore, when patients are screened for eligibility, only the H, E,  
13  
14 163 A and R components of the HEART score are evaluated. The HEAR score is turned into a HEART score  
15  
16 164 either by POC troponin T measurement in the ambulance, or by high-sensitive troponin T  
17  
18 165 measurement in the ED as part of standard care.

19 166 *Point-of-care troponin T*  
20

21 167 For the POC troponin T measurement, the Roche cobas h232 is used. The detection limit is 40-2000  
22  
23 168 ng/L. According to Roche, the measurement should be performed in a temperature of 18-32 °C and a  
24  
25 169 relative humidity of 10-80%.<sup>24</sup> Blood is obtained in a heparinized tube by venipuncture or venous  
26  
27 170 line. Using a Roche Cardiac pipette, 150 µL of blood is applied to the POC troponin T testing strip,  
28  
29 171 after inserting the testing strip in the cobas h232 POC system. After 14 minutes, the results are  
30  
31 172 available.  
32

33 173 *Follow-up*  
34

35 174 Follow-up will be performed by phone after thirty days, six months and twelve months. All potential  
36  
37 175 events, including hospital admissions, will be verified by review of medical record. Since the primary  
38  
39 176 aim in this study is to assess the cost effectiveness of the pre-hospital rule-out strategy, all health  
40  
41 177 care resources utilized by the patients will be collected in both arms.  
42

43 178 *Patient involvement*  
44

45 179 During the development of the study protocol, a participant of "Hareraad", a patient advisory  
46  
47 180 council for patients with cardiovascular disease, was involved. This patient representative is also  
48  
49 181 involved during the duration of the trial and will be consulted in case of unpredicted adverse events.  
50

51 182 *Study endpoints and cost effectiveness analysis*  
52

53 183 The primary outcome is health care costs at 30 days. This economic evaluation investigates the cost-  
54  
55 184 effectiveness of full implementation of a pre-hospital rule-out strategy compared to the standard  
56  
57 185 transfer to the hospital to rule out ACS. This will be done from a societal perspective. The empirical  
58  
59 186 cost effectiveness analysis (CEA) timeframe will adhere to the follow-up scheme of the secondary  
60  
187 endpoint, being thirty days, six months and twelve months. Cost and quality adjusted life years

1  
2  
3 188 (QALYs) will be measured on a per patient basis over the relevant time path in which the (most  
4  
5 189 important) differences between both arms manifest themselves. The design of the economic  
6  
7 190 evaluation follows the principles of a cost-utility analysis and adheres to the most recent Dutch  
8  
9 191 guidelines for performing economic evaluations in health care.<sup>25</sup> For reporting, the CHEERS checklist  
10  
11 192 will be used where relevant.<sup>26</sup> Cost-effectiveness will be expressed in terms of costs per QALY gained.  
12  
13 193 Quality of the health status of the patients is measured with a validated health-related quality of life  
14  
15 194 (HRQoL) instrument, the EuroQoL-5D (EQ-5D-5L). This HRQoL instrument will be completed by the  
16  
17 195 patients and is available in a validated Dutch translation.<sup>27</sup> The EQ-5D is a generic HRQoL instrument  
18  
19 196 comprising five domains: mobility, self-care, usual activities, pain/discomfort and anxiety/depression.  
20  
21 197 To assess productivity losses associated with chest pain, the Institute for Medical Technology  
22  
23 198 Assessment Productivity Cost Questionnaire (iMTA PCQ) will be used.<sup>28</sup> Uncertainty will be dealt with  
24  
25 199 by one-way sensitivity analysis (deterministic) and by parametric statistics ultimately presenting cost-  
26  
27 200 effectiveness acceptability curves. To ensure the quality of the economic evaluations, the  
28  
29 201 Radboudumc Technology Center Health Economics will be involved. Secondary endpoints will  
30  
31 202 determine the safety of the early rule-out strategy at 30 days, six months and twelve months, by  
32  
33 203 determining the incidence of MACE. MACE is defined as acute coronary syndrome (ACS), unplanned  
34  
35 204 revascularization and all cause death. Subgroup analyses will be performed according to gender,  
36  
37 205 assessment of the HEART score by paramedics or cardiologists, diabetic status and female-specific  
38  
39 206 risk factors.

### 207 *Sample size calculation*

208 The cost of hospital treatment is determined by the Dutch *Diagnose Behandel Combinatie (DBC)*  
209 hospital reimbursement system and the *DBC* information system, similar to the international  
210 diagnosis related groupings system (DRG).<sup>29</sup> When discharged from the ED after a negative  
211 evaluation for ACS, 50% will undergo further outpatient evaluation. This percentage and the  
212 percentages of further diagnostic testing (echocardiography and treadmill: 30%, non-invasive  
213 ischemia detection: 10% and coronary angiography: 5%) are all based on the 2017 DBC  
214 administration in the Radboudumc. In the pre-hospital rule out group, cost prices for diagnostics by  
215 the cardiologist (e.g. non-invasive ischemia detection and coronary angiography) are included, even  
216 when the probability of undergoing these tests is low. Based on the aforementioned percentages ,  
217 the cost difference between both groups is estimated to be € 507. For the primary outcome we  
218 assume a small effect size (0,2) and equal standard deviations in both arms of the trial. Group sample  
219 sizes of 392 and 392 achieve 80% power to detect the difference of € 507 between both groups with  
220 a significance level (alpha) of 0,05 using a two-sided two-sample t-test. To compensate for any loss of

221 follow-up, the sample size is enlarged by 10% to a total of 866 patients. The estimated inclusion rate  
222 will be one patient per day.

## 223 **Discussion**

224 The majority of patients suspected of a non ST-segment elevation acute coronary syndrome (NSTE-  
225 ACS) is currently presented at emergency departments (ED) to rule out an ACS. EDs are increasingly  
226 overcrowded and ambulance services are confronted with more patient transfers. However, in low-  
227 risk patients an ACS is rarely found.<sup>12</sup>

### 228 *Cost-effectiveness*

229 Health care costs are increasing because of multiple factors, such as increases in health care service  
230 price and intensity, population growth and aging.<sup>8</sup> Low-risk patients suspected of a NSTE-ACS often  
231 require an overnight stay in the hospital to undergo additional stress testing and imaging, but are not  
232 likely to benefit from additional testing.<sup>10</sup> Even in pre-hospital-adjudicated low-risk patients, acute  
233 healthcare utilization and costs are high, with limited added value.<sup>15</sup> In the year 2018 in the  
234 Netherlands, over one-fourth of the patients who were evaluated for chest pain and eventually  
235 discharged with benign non-cardiac chest pain were admitted to the hospital for at least one day.  
236 The average price for these admissions was € 1.355 in 2018 and is € 1.410 in 2019, while it was €  
237 1.220 in 2012.<sup>30</sup> The price for visiting the general practitioner (GP) for 5-20 minutes is € 9,97 during  
238 working hours and € 117,50 after working hours. However, it remains unclear how often the GPs will  
239 order additional tests or refer the patients to the ED or outpatient clinic, after a NSTE-ACS has been  
240 ruled out in the ambulance. Furthermore, the health care resource consumption in these patients  
241 represents the degree of reassurance in patients and in health care professionals (e.g. the general  
242 practitioner).

### 243 *The pre-hospital HEART score*

244 Recent studies have shown the safety of identifying low-risk chest pain patients in a pre-hospital  
245 environment.<sup>22, 23</sup> The FAMOUS triage study group has demonstrated that identifying low-risk chest  
246 pain patients by ambulance staff using a modified HEART score is feasible and safe when using a  
247 high-sensitive troponin T measurement in the hospital laboratory.<sup>22</sup> They have also shown that using  
248 a point of care (POC) troponin T measurement to turn the HEAR score into the HEART score in the  
249 pre-hospital setting has important additional predictive value.<sup>31</sup> Furthermore, they have shown that  
250 in patients suspected of NSTE-ACS, HEART score assessment using a POC troponin T measurement by  
251 ambulance paramedics is accurate in identifying low-risk patients.<sup>23</sup>

1  
2  
3 252 *POC troponin T*  
4

5  
6 253 The POC troponin T measured with the Roche cobas h232 yields very good analytical concordance  
7 254 with high sensitive troponin T.<sup>32</sup> This POC-test can be used as a bedside test with a fast turn-around  
8  
9 255 time (<15 minutes) and was also used by the FAMOUS triage study group. The POC troponin T test  
10  
11 256 has already shown to have a high predictive value for mortality in high-risk patient.<sup>33</sup>  
12

13 257 *The general practitioner*  
14

15  
16 258 In the Netherlands, the GP is a gatekeeper to hospital- and specialist care. GPs offer out-of-hour  
17  
18 259 services by GP cooperatives across the whole country.<sup>34</sup> Therefore, implementation of a rule-out  
19  
20 260 strategy for NSTEMI-ACS in the ambulance is possible, without leaving the patients to fend for  
21  
22 261 themselves when they are not transferred to the ED.

23 262 **Conclusion**  
24

25  
26 263 The ARTICA trial is the first randomized trial on cost-effectiveness of an early rule-out strategy for  
27  
28 264 low-risk patients suspected of an acute coronary syndrome, using a point-of-care troponin  
29  
30 265 measurement outside the hospital setting. The results of this study are expected to have a major  
31  
32 266 impact on the healthcare organization of chest pain patients.

33 267 **Ethics and dissemination**  
34

35  
36 268 This trial has been accepted by the Medical Research Ethics Committee region Arnhem-Nijmegen.  
37  
38 269 The results of this trial will be published in peer-reviewed journals and presented at national and  
39  
40 270 international conferences.

41 271 **Funding**  
42

43  
44 272 The study is supported by ZonMw, grant number 852001942.  
45

46 273 **Conflict of interest**  
47

48  
49 274 The authors declare no conflict of interest.  
50

51 275 **Authors' contributions**  
52

53  
54 276 CC conceived the idea. GA, CC, RvG, EC, RvK, PD and NvR designed the study methodology. EA  
55  
56 277 designed the economical and statistical analyses. GA and CC drafted the manuscript. RvG, EC, RvK,  
57  
58 278 PD, PvG, EA, PG, MR, OO, MG and NvR provided critical revisions and substantial intellectual input.  
59  
60 279 GA takes full responsibility for the data acquisition. All authors agreed with the final version of the  
280 manuscript.



281 **References**

- 282 1. Ibanez B, James S, Agewall S, et al. 2017 ESC Guidelines for the management of acute  
283 myocardial infarction in patients presenting with ST-segment elevation. *Rev Esp Cardiol (Engl Ed)*  
284 2017; 70: 1082. 2017/12/05. DOI: 10.1016/j.rec.2017.11.010.
- 285 2. Roffi M, Patrono C, Collet JP, et al. 2015 ESC Guidelines for the Management of Acute  
286 Coronary Syndromes in Patients Presenting Without Persistent ST-segment Elevation. *Rev Esp Cardiol*  
287 *(Engl Ed)* 2015; 68: 1125. 2015/12/18. DOI: 10.1016/j.rec.2015.10.009.
- 288 3. Mockel M, Searle J, Muller R, et al. Chief complaints in medical emergencies: do they relate  
289 to underlying disease and outcome? The Charite Emergency Medicine Study (CHARITEM). *Eur J*  
290 *Emerg Med* 2013; 20: 103-108. 2012/03/06. DOI: 10.1097/MEJ.0b013e328351e609.
- 291 4. Langlo NM, Orvik AB, Dale J, et al. The acute sick and injured patients: an overview of the  
292 emergency department patient population at a Norwegian University Hospital Emergency  
293 Department. *Eur J Emerg Med* 2014; 21: 175-180. 2013/05/18. DOI:  
294 10.1097/MEJ.0b013e3283629c18.
- 295 5. Pitts SR, Niska RW, Xu J, et al. National Hospital Ambulatory Medical Care Survey: 2006  
296 emergency department summary. *Natl Health Stat Report* 2008: 1-38. 2008/10/31.
- 297 6. Sun BC, Hsia RY, Weiss RE, et al. Effect of emergency department crowding on outcomes of  
298 admitted patients. *Ann Emerg Med* 2013; 61: 605-611 e606. 2012/12/12. DOI:  
299 10.1016/j.annemergmed.2012.10.026.
- 300 7. Rasouli HR, Esfahani AA, Nobakht M, et al. Outcomes of Crowding in Emergency  
301 Departments; a Systematic Review. *Arch Acad Emerg Med* 2019; 7: e52. 2019/10/12.
- 302 8. Dieleman JL, Squires E, Bui AL, et al. Factors Associated With Increases in US Health Care  
303 Spending, 1996-2013. *JAMA* 2017; 318: 1668-1678. 2017/11/09. DOI: 10.1001/jama.2017.15927.
- 304 9. OECD. *Health at a Glance 2019*. 2019.
- 305 10. Mahler SA, Hiestand BC, Goff DC, Jr., et al. Can the HEART score safely reduce stress testing  
306 and cardiac imaging in patients at low risk for major adverse cardiac events? *Crit Pathw Cardiol* 2011;  
307 10: 128-133. 2011/10/13. DOI: 10.1097/HPC.0b013e3182315a85.
- 308 11. Poldervaart JM, Reitsma JB, Backus BE, et al. Effect of Using the HEART Score in Patients With  
309 Chest Pain in the Emergency Department: A Stepped-Wedge, Cluster Randomized Trial. *Ann Intern*  
310 *Med* 2017; 166: 689-697. 2017/04/25. DOI: 10.7326/M16-1600.
- 311 12. Nasrallah N, Steiner H and Hasin Y. The challenge of chest pain in the emergency room: now  
312 and the future. *Eur Heart J* 2011; 32: 656. 2011/04/28.
- 313 13. Allen BR, Simpson GG, Zeinali I, et al. Incorporation of the HEART Score Into a Low-risk Chest  
314 Pain Pathway to Safely Decrease Admissions. *Crit Pathw Cardiol* 2018; 17: 184-190. 2018/11/13. DOI:  
315 10.1097/HPC.000000000000155.
- 316 14. Six AJ, Backus BE, Kingma A, et al. Consumption of diagnostic procedures and other  
317 cardiology care in chest pain patients after presentation at the emergency department. *Neth Heart J*  
318 2012; 20: 499-504. 2012/10/24. DOI: 10.1007/s12471-012-0322-6.
- 319 15. van Dongen DN, Ottervanger JP, Tolsma R, et al. In-Hospital Healthcare Utilization,  
320 Outcomes, and Costs in Pre-Hospital-Adjudicated Low-Risk Chest-Pain Patients. *Appl Health Econ*  
321 *Health Policy* 2019 2019/08/08. DOI: 10.1007/s40258-019-00502-6.
- 322 16. Riley RF, Miller CD, Russell GB, et al. Cost analysis of the History, ECG, Age, Risk factors, and  
323 initial Troponin (HEART) Pathway randomized control trial. *Am J Emerg Med* 2017; 35: 77-81.  
324 2016/10/22. DOI: 10.1016/j.ajem.2016.10.005.
- 325 17. Six AJ, Backus BE and Kelder JC. Chest pain in the emergency room: value of the HEART score.  
326 *Neth Heart J* 2008; 16: 191-196. 2008/07/31.
- 327 18. Van Den Berg P and Body R. The HEART score for early rule out of acute coronary syndromes  
328 in the emergency department: a systematic review and meta-analysis. *Eur Heart J Acute Cardiovasc*  
329 *Care* 2018; 7: 111-119. 2017/05/24. DOI: 10.1177/2048872617710788.

- 1  
2  
3 330 19. Laureano-Phillips J, Robinson RD, Aryal S, et al. HEART Score Risk Stratification of Low-Risk  
4 331 Chest Pain Patients in the Emergency Department: A Systematic Review and Meta-Analysis. *Ann*  
5 332 *Emerg Med* 2019; 2019/02/06. DOI: 10.1016/j.annemergmed.2018.12.010.
- 6 333 20. Mahler SA, Riley RF, Hiestand BC, et al. The HEART Pathway randomized trial: identifying  
7 334 emergency department patients with acute chest pain for early discharge. *Circ Cardiovasc Qual*  
8 335 *Outcomes* 2015; 8: 195-203. 2015/03/05. DOI: 10.1161/CIRCOUTCOMES.114.001384.
- 9 336 21. Niven WGP, Wilson D, Goodacre S, et al. Do all HEART Scores beat the same: evaluating the  
10 337 interoperator reliability of the HEART Score. *Emerg Med J* 2018; 35: 732-738. 2018/09/16. DOI:  
11 338 10.1136/emermed-2018-207540.
- 12 339 22. Ishak M, Ali D, Fokkert MJ, et al. Fast assessment and management of chest pain patients  
13 340 without ST-elevation in the pre-hospital gateway (FamouS Triage): ruling out a myocardial infarction  
14 341 at home with the modified HEART score. *Eur Heart J Acute Cardiovasc Care* 2018; 7: 102-110.  
15 342 2017/01/14. DOI: 10.1177/2048872616687116.
- 16 343 23. van Dongen DN, Tolsma RT, Fokkert MJ, et al. Pre-hospital risk assessment in suspected non-  
17 344 ST-elevation acute coronary syndrome: A prospective observational study. *Eur Heart J Acute*  
18 345 *Cardiovasc Care* 2018; 2048872618813846. 2018/11/24. DOI: 10.1177/2048872618813846.
- 19 346 24. Diagnostics R. Roche CARDIAC POC Troponin T Method Sheet. <http://diagnostics.roche.com>  
20 347 2019.
- 21 348 25. Institute NHC. Guideline for economic evaluations in healthcare.  
22 349 [https://english.zorginstituutnederland.nl/publications/reports/2016/06/16/guideline-for-economic-](https://english.zorginstituutnederland.nl/publications/reports/2016/06/16/guideline-for-economic-evaluations-in-healthcare)  
23 350 [evaluations-in-healthcare](https://english.zorginstituutnederland.nl/publications/reports/2016/06/16/guideline-for-economic-evaluations-in-healthcare) 2016.
- 24 351 26. Husereau D, Drummond M, Petrou S, et al. Consolidated Health Economic Evaluation  
25 352 Reporting Standards (CHEERS) statement. *Value Health* 2013; 16: e1-5. 2013/03/30. DOI:  
26 353 10.1016/j.jval.2013.02.010.
- 27 354 27. M MV, K MV, S MAAE, et al. Dutch Tariff for the Five-Level Version of EQ-5D. *Value Health*  
28 355 2016; 19: 343-352. 2016/06/22. DOI: 10.1016/j.jval.2016.01.003.
- 29 356 28. Bouwmans C, Krol M, Severens H, et al. The iMTA Productivity Cost Questionnaire: A  
30 357 Standardized Instrument for Measuring and Valuing Health-Related Productivity Losses. *Value Health*  
31 358 2015; 18: 753-758. 2015/09/28. DOI: 10.1016/j.jval.2015.05.009.
- 32 359 29. Schreyogg J, Stargardt T, Tiemann O, et al. Methods to determine reimbursement rates for  
33 360 diagnosis related groups (DRG): a comparison of nine European countries. *Health Care Manag Sci*  
34 361 2006; 9: 215-223. 2006/10/05.
- 35 362 30. Authority DH. Open data DBC information system (DIS), <http://www.opendisdata.nl>.
- 36 363 31. van Dongen DN, Fokkert MJ, Tolsma RT, et al. Value of Prehospital Troponin Assessment in  
37 364 Suspected Non-ST-Elevation Acute Coronary Syndrome. *Am J Cardiol* 2018; 122: 1610-1616.  
38 365 2018/09/29. DOI: 10.1016/j.amjcard.2018.07.037.
- 39 366 32. Jungbauer C, Hupf J, Giannitsis E, et al. Analytical and Clinical Validation of a Point-of-Care  
40 367 Cardiac Troponin T Test with an Improved Detection Limit. *Clin Lab* 2017; 63: 633-645. 2017/04/12.  
41 368 DOI: 10.7754/Clin.Lab.2016.160814.
- 42 369 33. Rasmussen MB, Stengaard C, Sorensen JT, et al. Predictive value of routine point-of-care  
43 370 cardiac troponin T measurement for prehospital diagnosis and risk-stratification in patients with  
44 371 suspected acute myocardial infarction. *Eur Heart J Acute Cardiovasc Care* 2017; 2048872617745893.  
45 372 2017/12/05. DOI: 10.1177/2048872617745893.
- 46 373 34. Faber MJ, Burgers JS and Westert GP. A sustainable primary care system: lessons from the  
47 374 Netherlands. *J Ambul Care Manage* 2012; 35: 174-181. 2012/06/07. DOI:  
48 375 10.1097/JAC.0b013e31823e83a4.

376

377 **Figure caption**

1  
2  
3 378 **Figure 1.**

4 379 The original HEART score, with permission of the authors. ECG = electrocardiogram, LBBB = left  
5 380 bundle branch block, PM = pacemaker, BMI = body mass index.

7  
8 381 **Figure 2.**

9 382 The ARTICA trial flow chart. HEAR score = History, Electrocardiogram, Age, Risk factors score, POC =  
10 383 Point of care, POCT = Point of care troponin, ED = Emergency department, GP = General practitioner.

12 384 **Figure 3.**

13 385 The modified HEART score in the ARTICA trial. ECG = electrocardiogram, LBBB = left bundle branch  
14 386 block, PM = pacemaker, BMI = body mass index.

15 387  
16  
17  
18  
19  
20  
21  
22  
23  
24  
25  
26  
27  
28  
29  
30  
31  
32  
33  
34  
35  
36  
37  
38  
39  
40  
41  
42  
43  
44  
45  
46  
47  
48  
49  
50  
51  
52  
53  
54  
55  
56  
57  
58  
59  
60

For peer review only

# HEART

## HEART score for chest pain patients

|                                       |                                                               |              |  |
|---------------------------------------|---------------------------------------------------------------|--------------|--|
| <b><u>H</u>istory<br/>(Anamnesis)</b> | Highly suspicious                                             | 2            |  |
|                                       | Moderately suspicious                                         | 1            |  |
|                                       | Slightly suspicious                                           | 0            |  |
| <b><u>E</u>CG</b>                     | Significant ST-deviation                                      | 2            |  |
|                                       | Non-specific repolarisation disturbance / LBBB / PM           | 1            |  |
|                                       | Normal                                                        | 0            |  |
| <b><u>A</u>ge</b>                     | ≥ 65 years                                                    | 2            |  |
|                                       | 45 – 65 years                                                 | 1            |  |
|                                       | ≤ 45 years                                                    | 0            |  |
| <b><u>R</u>isk factors</b>            | ≥ 3 risk factors <i>or</i> history of atherosclerotic disease | 2            |  |
|                                       | 1 or 2 risk factors                                           | 1            |  |
|                                       | No risk factors known                                         | 0            |  |
| <b><u>T</u>roponin</b>                | ≥ 3x normal limit                                             | 2            |  |
|                                       | 1-3x normal limit                                             | 1            |  |
|                                       | ≤ normal limit                                                | 0            |  |
|                                       |                                                               | <b>Total</b> |  |

### Risk factors for atherosclerotic disease:

Hypercholesterolemia

Cigarette smoking

Hypertension

Positive family history

Diabetes Mellitus

Obesity (BMI>30)

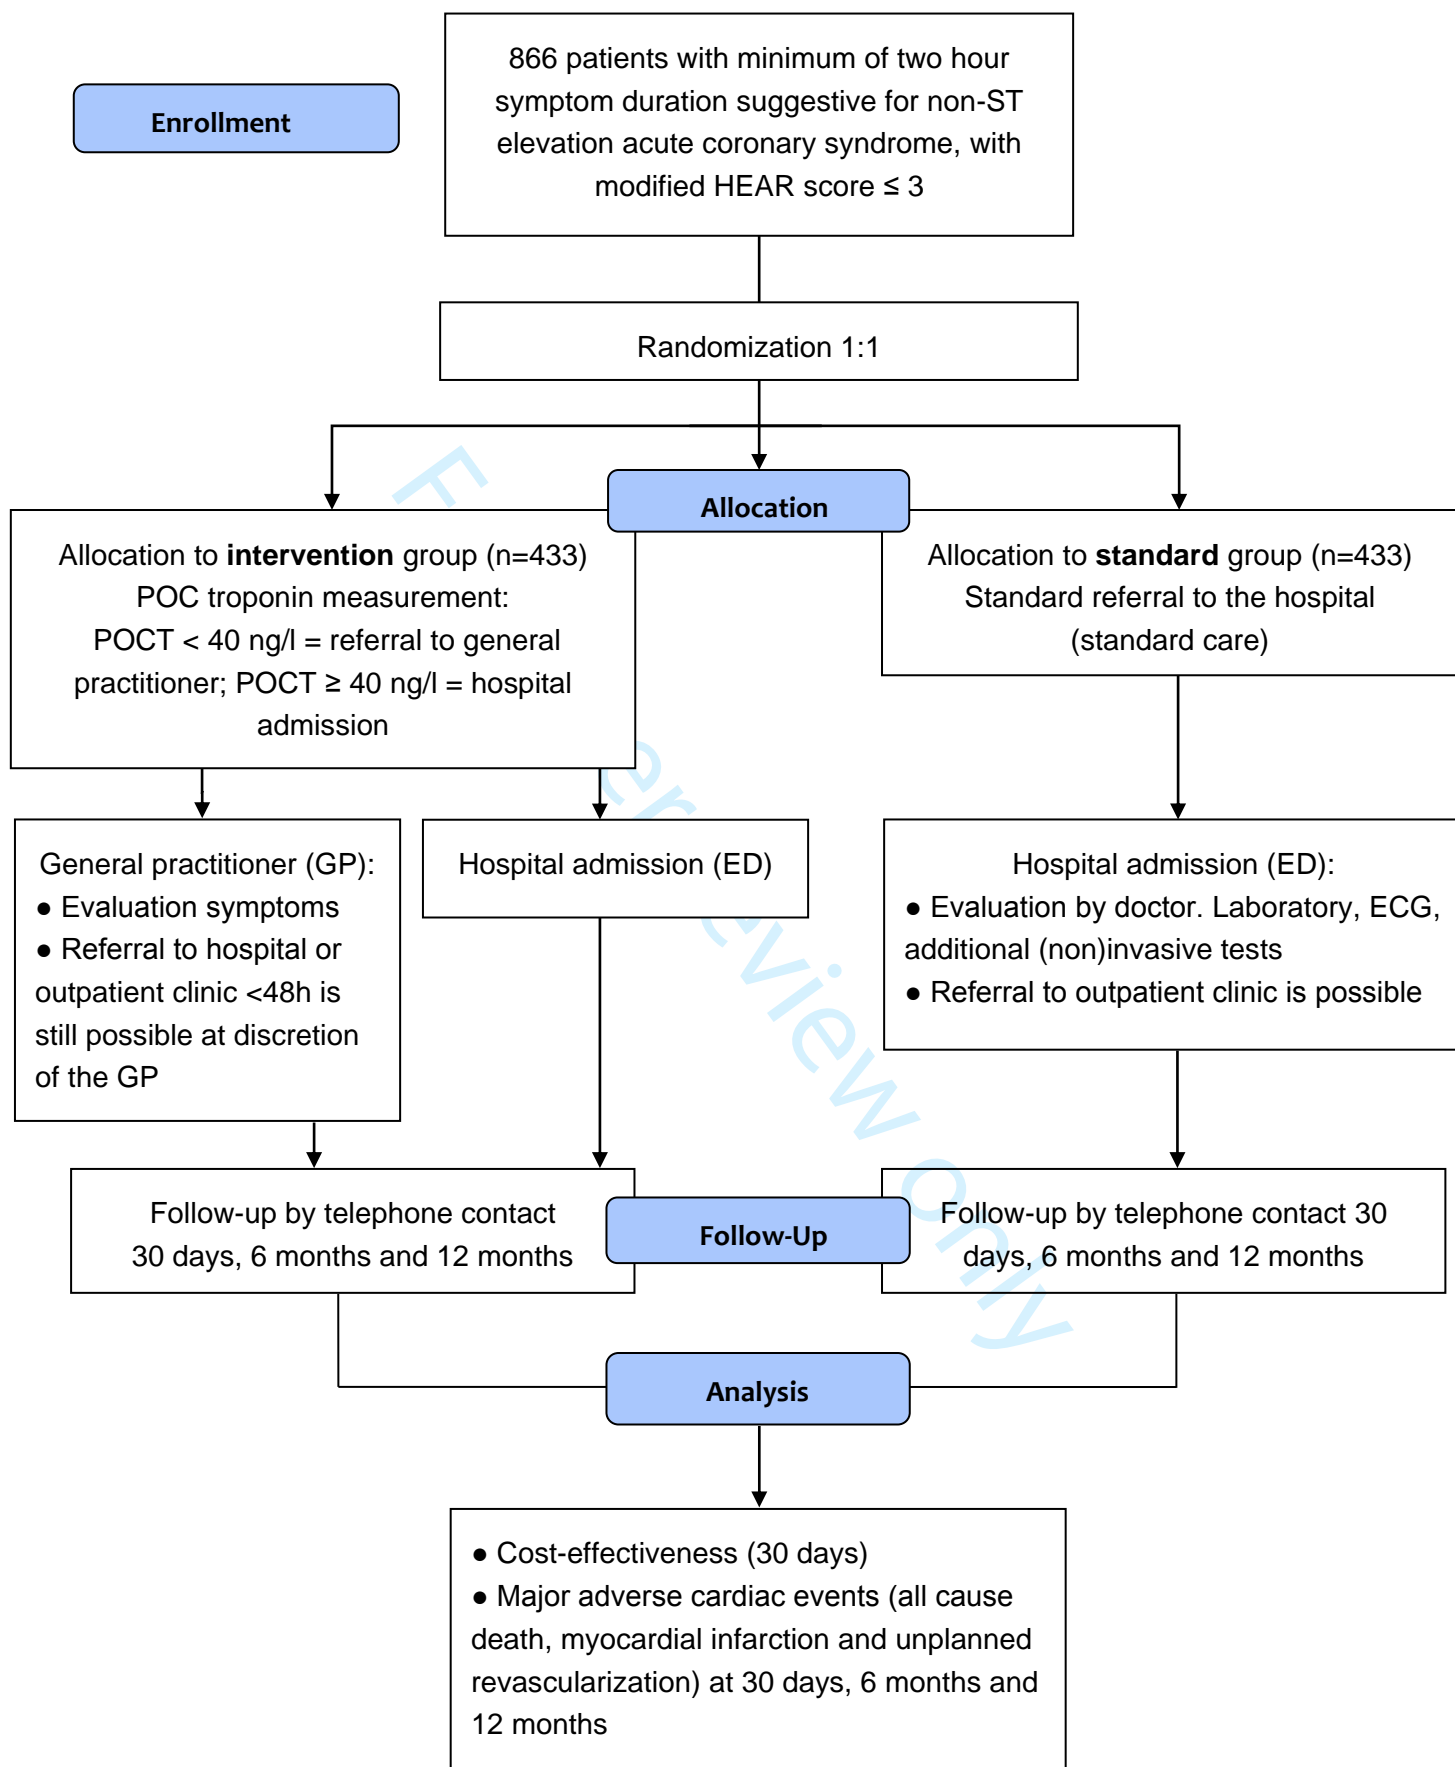



# ARTICA

RANDOMIZED TRIAL

## Modified HEART Score

|                                                                                                                                                                                                                                                            |                                                                     |          |
|------------------------------------------------------------------------------------------------------------------------------------------------------------------------------------------------------------------------------------------------------------|---------------------------------------------------------------------|----------|
| <b>History</b>                                                                                                                                                                                                                                             | <b>Highly suspicious</b>                                            | <b>2</b> |
|                                                                                                                                                                                                                                                            | <b>Moderately suspicious</b>                                        | <b>1</b> |
|                                                                                                                                                                                                                                                            | <b>Slightly suspicious</b>                                          | <b>0</b> |
| <b>ECG</b>                                                                                                                                                                                                                                                 | <b>Significant ST-segment depression</b>                            | <b>2</b> |
|                                                                                                                                                                                                                                                            | <b>Non specific repolarization disturbance</b>                      | <b>1</b> |
|                                                                                                                                                                                                                                                            | <b>LBBB or PM</b>                                                   | <b>1</b> |
|                                                                                                                                                                                                                                                            | <b>Normal</b>                                                       | <b>0</b> |
| <b>Age</b>                                                                                                                                                                                                                                                 | <b>≥65 years</b>                                                    | <b>2</b> |
|                                                                                                                                                                                                                                                            | <b>45-65 years</b>                                                  | <b>1</b> |
|                                                                                                                                                                                                                                                            | <b>&lt;45 years</b>                                                 | <b>0</b> |
| <b>Risk factors</b>                                                                                                                                                                                                                                        | <b>≥3 risk factors <i>OR</i> history of atherosclerotic disease</b> | <b>2</b> |
|                                                                                                                                                                                                                                                            | <b>1 or 2 risk factors</b>                                          | <b>1</b> |
|                                                                                                                                                                                                                                                            | <b>No risk factors</b>                                              | <b>0</b> |
| <b>Troponin T point of care</b>                                                                                                                                                                                                                            | <b>&gt;60 ng/L</b>                                                  | <b>2</b> |
|                                                                                                                                                                                                                                                            | <b>40-60 ng/L</b>                                                   | <b>1</b> |
|                                                                                                                                                                                                                                                            | <b>&lt;40 ng/L</b>                                                  | <b>0</b> |
| <b>Risk factors:</b> <ul style="list-style-type: none"> <li>• Smoking</li> <li>• Hypertension</li> <li>• Diabetes mellitus</li> <li>• Obesity (BMI &gt; 30 kg/m<sup>2</sup>)</li> <li>• Hypercholesterolemia</li> <li>• Positive family history</li> </ul> |                                                                     |          |

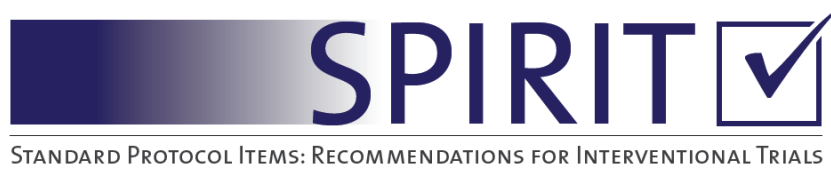

SPIRIT 2013 Checklist: Recommended items to address in a clinical trial protocol and related documents\*

| Section/item                      | Item No | Description                                                                                                                                                                                                                                                     |
|-----------------------------------|---------|-----------------------------------------------------------------------------------------------------------------------------------------------------------------------------------------------------------------------------------------------------------------|
| <b>Administrative information</b> |         |                                                                                                                                                                                                                                                                 |
| Title                             | 1       | Descriptive title identifying the study design, population, interventions, and, if applicable, trial acronym<br><b><u>Page 1, lines 1-3</u></b>                                                                                                                 |
| Trial registration                | 2a      | Trial identifier and registry name. If not yet registered, name of intended registry<br><b><u>Page 3, line 68</u></b>                                                                                                                                           |
|                                   | 2b      | All items from the World Health Organization Trial Registration Data Set<br><a href="https://www.trialregister.nl/trial/7148">https://www.trialregister.nl/trial/7148</a>                                                                                       |
| Protocol version                  | 3       | Date and version identifier<br><b><u>Issue date:</u></b> 10 March 2019<br><b><u>Version:</u></b> 1.9<br>The trial started while using protocol version 1.8.<br>Reason for amendment: Addition of a second region in which the trial is conducted.               |
| Funding                           | 4       | Sources and types of financial, material, and other support<br><b><u>Page 11, line 272</u></b>                                                                                                                                                                  |
| Roles and responsibilities        | 5a      | Names, affiliations, and roles of protocol contributors<br><b><u>Page 11, lines 276-277</u></b>                                                                                                                                                                 |
|                                   | 5b      | Name and contact information for the trial sponsor<br><b><u>Trial sponsor:</u></b><br>Radboudumc<br>Department of Cardiology<br>Contact name: Prof. N. van Royen<br>Address: Geert Grooteplein Zuid 10, 6525 GA Nijmegen<br>Email: Niels.vanRoyen@radboudumc.nl |

- 1  
2  
3  
4  
5  
6  
7  
8  
9  
10  
11  
12  
13  
14  
15  
16  
17  
18  
19  
20  
21  
22  
23  
24  
25  
26  
27  
28  
29  
30  
31  
32  
33  
34  
35  
36  
37  
38  
39  
40  
41  
42  
43  
44  
45  
46  
47  
48  
49  
50  
51  
52  
53  
54  
55  
56  
57  
58  
59  
60
- 5c Role of study sponsor and funders, if any, in study design; collection, management, analysis, and interpretation of data; writing of the report; and the decision to submit the report for publication, including whether they will have ultimate authority over any of these activities

**The design of the study underwent peer review in order to gain funding by ZonMw. However, the funding source will not have any role during its execution, analyses, interpretation of the data, or decision to submit results.**

- 5d Composition, roles, and responsibilities of the coordinating centre, steering committee, endpoint adjudication committee, data management team, and other individuals or groups overseeing the trial, if applicable (see Item 21a for data monitoring committee)

**Principal investigator and research physician**

Design and conduct of ARTICA  
Preparation of protocol and revisions  
Preparation of case report forms and patient information  
Education of paramedics  
Maintenance of trial IT system, website and data entry  
Follow-up of patients  
Organising steering committee meetings  
Publication of study reports  
Responsible for trial master file  
Budget administration and contractual issues with ambulance regions

**ARTICA trial team**

(see title page and protocol for members)  
Agreement of final protocol  
Reviewing progress of study and if necessary agreeing changes to the protocol.

**Patient representative**

**Page 7, lines 179-181**

**Ambulance paramedics**

Patient selection, screening, randomisation and primary data entry

**Monitor**

Data verification

**Introduction**

- Background and rationale 6a Description of research question and justification for undertaking the trial, including summary of relevant studies (published and unpublished) examining benefits and harms for each intervention  
**Page 5, lines 91-126**



|    |                                                           |     |                                                                                                                                                                                                                                                                                                                                                                                |
|----|-----------------------------------------------------------|-----|--------------------------------------------------------------------------------------------------------------------------------------------------------------------------------------------------------------------------------------------------------------------------------------------------------------------------------------------------------------------------------|
| 1  |                                                           |     |                                                                                                                                                                                                                                                                                                                                                                                |
| 2  |                                                           | 6b  | Explanation for choice of comparators                                                                                                                                                                                                                                                                                                                                          |
| 3  |                                                           |     | <b><u>Pages 5-6, lines 118-126</u></b>                                                                                                                                                                                                                                                                                                                                         |
| 4  |                                                           |     |                                                                                                                                                                                                                                                                                                                                                                                |
| 5  | Objectives                                                | 7   | Specific objectives or hypotheses                                                                                                                                                                                                                                                                                                                                              |
| 6  |                                                           |     | <b><u>Page 6, lines 129-133</u></b>                                                                                                                                                                                                                                                                                                                                            |
| 7  |                                                           |     |                                                                                                                                                                                                                                                                                                                                                                                |
| 8  | Trial design                                              | 8   | Description of trial design including type of trial (eg, parallel group, crossover, factorial, single group), allocation ratio, and framework (eg, superiority, equivalence, noninferiority, exploratory)                                                                                                                                                                      |
| 9  |                                                           |     | <b><u>Page 6, lines 135-150</u></b>                                                                                                                                                                                                                                                                                                                                            |
| 10 |                                                           |     |                                                                                                                                                                                                                                                                                                                                                                                |
| 11 |                                                           |     |                                                                                                                                                                                                                                                                                                                                                                                |
| 12 |                                                           |     |                                                                                                                                                                                                                                                                                                                                                                                |
| 13 |                                                           |     |                                                                                                                                                                                                                                                                                                                                                                                |
| 14 | <b>Methods: Participants, interventions, and outcomes</b> |     |                                                                                                                                                                                                                                                                                                                                                                                |
| 15 |                                                           |     |                                                                                                                                                                                                                                                                                                                                                                                |
| 16 | Study setting                                             | 9   | Description of study settings (eg, community clinic, academic hospital) and list of countries where data will be collected. Reference to where list of study sites can be obtained                                                                                                                                                                                             |
| 17 |                                                           |     | <b><u>Page 6, lines 135-150</u></b>                                                                                                                                                                                                                                                                                                                                            |
| 18 |                                                           |     |                                                                                                                                                                                                                                                                                                                                                                                |
| 19 |                                                           |     |                                                                                                                                                                                                                                                                                                                                                                                |
| 20 |                                                           |     |                                                                                                                                                                                                                                                                                                                                                                                |
| 21 |                                                           |     |                                                                                                                                                                                                                                                                                                                                                                                |
| 22 |                                                           |     |                                                                                                                                                                                                                                                                                                                                                                                |
| 23 |                                                           |     | <b><u>List of study sites:</u></b> <a href="http://www.ARTICATrial.nl">http://www.ARTICATrial.nl</a>                                                                                                                                                                                                                                                                           |
| 24 | Eligibility criteria                                      | 10  | Inclusion and exclusion criteria for participants. If applicable, eligibility criteria for study centres and individuals who will perform the interventions (eg, surgeons, psychotherapists)                                                                                                                                                                                   |
| 25 |                                                           |     | <b><u>Pages 6-8, lines 151-159</u></b>                                                                                                                                                                                                                                                                                                                                         |
| 26 |                                                           |     |                                                                                                                                                                                                                                                                                                                                                                                |
| 27 |                                                           |     |                                                                                                                                                                                                                                                                                                                                                                                |
| 28 |                                                           |     |                                                                                                                                                                                                                                                                                                                                                                                |
| 29 |                                                           |     |                                                                                                                                                                                                                                                                                                                                                                                |
| 30 | Interventions                                             | 11a | Interventions for each group with sufficient detail to allow replication, including how and when they will be administered                                                                                                                                                                                                                                                     |
| 31 |                                                           |     | <b><u>Page 6, lines 142-148</u></b>                                                                                                                                                                                                                                                                                                                                            |
| 32 |                                                           |     |                                                                                                                                                                                                                                                                                                                                                                                |
| 33 |                                                           |     |                                                                                                                                                                                                                                                                                                                                                                                |
| 34 |                                                           |     |                                                                                                                                                                                                                                                                                                                                                                                |
| 35 |                                                           | 11b | Criteria for discontinuing or modifying allocated interventions for a given trial participant (eg, drug dose change in response to harms, participant request, or improving/worsening disease)                                                                                                                                                                                 |
| 36 |                                                           |     | <b><u>Not applicable.</u></b>                                                                                                                                                                                                                                                                                                                                                  |
| 37 |                                                           |     |                                                                                                                                                                                                                                                                                                                                                                                |
| 38 |                                                           |     |                                                                                                                                                                                                                                                                                                                                                                                |
| 39 |                                                           |     |                                                                                                                                                                                                                                                                                                                                                                                |
| 40 |                                                           |     |                                                                                                                                                                                                                                                                                                                                                                                |
| 41 |                                                           | 11c | Strategies to improve adherence to intervention protocols, and any procedures for monitoring adherence (eg, drug tablet return, laboratory tests)                                                                                                                                                                                                                              |
| 42 |                                                           |     | <b><u>Not applicable.</u></b>                                                                                                                                                                                                                                                                                                                                                  |
| 43 |                                                           |     |                                                                                                                                                                                                                                                                                                                                                                                |
| 44 |                                                           |     |                                                                                                                                                                                                                                                                                                                                                                                |
| 45 |                                                           |     |                                                                                                                                                                                                                                                                                                                                                                                |
| 46 |                                                           | 11d | Relevant concomitant care and interventions that are permitted or prohibited during the trial                                                                                                                                                                                                                                                                                  |
| 47 |                                                           |     | <b><u>Not applicable.</u></b>                                                                                                                                                                                                                                                                                                                                                  |
| 48 |                                                           |     |                                                                                                                                                                                                                                                                                                                                                                                |
| 49 |                                                           |     |                                                                                                                                                                                                                                                                                                                                                                                |
| 50 | Outcomes                                                  | 12  | Primary, secondary, and other outcomes, including the specific measurement variable (eg, systolic blood pressure), analysis metric (eg, change from baseline, final value, time to event), method of aggregation (eg, median, proportion), and time point for each outcome. Explanation of the clinical relevance of chosen efficacy and harm outcomes is strongly recommended |
| 51 |                                                           |     | <b><u>Pages 8-9, lines 183-206</u></b>                                                                                                                                                                                                                                                                                                                                         |
| 52 |                                                           |     |                                                                                                                                                                                                                                                                                                                                                                                |
| 53 |                                                           |     |                                                                                                                                                                                                                                                                                                                                                                                |
| 54 |                                                           |     |                                                                                                                                                                                                                                                                                                                                                                                |
| 55 |                                                           |     |                                                                                                                                                                                                                                                                                                                                                                                |
| 56 |                                                           |     |                                                                                                                                                                                                                                                                                                                                                                                |
| 57 |                                                           |     |                                                                                                                                                                                                                                                                                                                                                                                |
| 58 |                                                           |     |                                                                                                                                                                                                                                                                                                                                                                                |
| 59 |                                                           |     |                                                                                                                                                                                                                                                                                                                                                                                |
| 60 |                                                           |     |                                                                                                                                                                                                                                                                                                                                                                                |

|    |             |    |                                                                                                         |
|----|-------------|----|---------------------------------------------------------------------------------------------------------|
| 1  |             |    |                                                                                                         |
| 2  | Participant | 13 | Time schedule of enrolment, interventions (including any run-ins and                                    |
| 3  | timeline    |    | washouts), assessments, and visits for participants. A schematic                                        |
| 4  |             |    | diagram is highly recommended (see Figure)                                                              |
| 5  |             |    | <b><u>Page 8, lines 174-177</u></b>                                                                     |
| 6  |             |    | <b><u>Figure 2</u></b>                                                                                  |
| 7  |             |    |                                                                                                         |
| 8  | Sample size | 14 | Estimated number of participants needed to achieve study objectives                                     |
| 9  |             |    | and how it was determined, including clinical and statistical                                           |
| 10 |             |    | assumptions supporting any sample size calculations                                                     |
| 11 |             |    | <b><u>Pages 9-10, lines 208-222</u></b>                                                                 |
| 12 |             |    |                                                                                                         |
| 13 | Recruitment | 15 | Strategies for achieving adequate participant enrolment to reach                                        |
| 14 |             |    | target sample size                                                                                      |
| 15 |             |    | <b><u>Education of ambulance paramedics, frequent newsletters and</u></b>                               |
| 16 |             |    | <b><u>an instruction video (<a href="http://www.ARTICAtrial.nl">http://www.ARTICAtrial.nl</a>).</u></b> |
| 17 |             |    |                                                                                                         |
| 18 |             |    |                                                                                                         |
| 19 |             |    |                                                                                                         |

### Methods: Assignment of interventions (for controlled trials)

#### Allocation:

|    |                |     |                                                                         |
|----|----------------|-----|-------------------------------------------------------------------------|
| 22 |                |     |                                                                         |
| 23 |                |     |                                                                         |
| 24 | Sequence       | 16a | Method of generating the allocation sequence (eg, computer-             |
| 25 | generation     |     | generated random numbers), and list of any factors for stratification.  |
| 26 |                |     | To reduce predictability of a random sequence, details of any planned   |
| 27 |                |     | restriction (eg, blocking) should be provided in a separate document    |
| 28 |                |     | that is unavailable to those who enrol participants or assign           |
| 29 |                |     | interventions                                                           |
| 30 |                |     | <b><u>Page 6, lines 140-142</u></b>                                     |
| 31 |                |     |                                                                         |
| 32 |                |     |                                                                         |
| 33 | Allocation     | 16b | Mechanism of implementing the allocation sequence (eg, central          |
| 34 | concealment    |     | telephone; sequentially numbered, opaque, sealed envelopes),            |
| 35 | mechanism      |     | describing any steps to conceal the sequence until interventions are    |
| 36 |                |     | assigned                                                                |
| 37 |                |     | <b><u>Page 6, lines 140-142</u></b>                                     |
| 38 |                |     |                                                                         |
| 39 |                |     |                                                                         |
| 40 | Implementation | 16c | Who will generate the allocation sequence, who will enrol participants, |
| 41 |                |     | and who will assign participants to interventions                       |
| 42 |                |     | <b><u>Page 6, lines 135-142</u></b>                                     |
| 43 |                |     |                                                                         |
| 44 |                |     |                                                                         |
| 45 | Blinding       | 17a | Who will be blinded after assignment to interventions (eg, trial        |
| 46 | (masking)      |     | participants, care providers, outcome assessors, data analysts), and    |
| 47 |                |     | how                                                                     |
| 48 |                |     | <b><u>Not applicable</u></b>                                            |
| 49 |                |     |                                                                         |
| 50 |                |     |                                                                         |
| 51 |                | 17b | If blinded, circumstances under which unblinding is permissible, and    |
| 52 |                |     | procedure for revealing a participant's allocated intervention during   |
| 53 |                |     | the trial                                                               |
| 54 |                |     | <b><u>Not applicable</u></b>                                            |
| 55 |                |     |                                                                         |

### Methods: Data collection, management, and analysis

|    |                            |     |                                                                                |
|----|----------------------------|-----|--------------------------------------------------------------------------------|
| 1  |                            |     |                                                                                |
| 2  | Data collection            | 18a | Plans for assessment and collection of outcome, baseline, and other            |
| 3  | methods                    |     | trial data, including any related processes to promote data quality (eg,       |
| 4  |                            |     | duplicate measurements, training of assessors) and a description of            |
| 5  |                            |     | study instruments (eg, questionnaires, laboratory tests) along with            |
| 6  |                            |     | their reliability and validity, if known. Reference to where data              |
| 7  |                            |     | collection forms can be found, if not in the protocol                          |
| 8  |                            |     | <b><u>Page 8, lines 174-177</u></b>                                            |
| 9  |                            |     | <b><u>Page 9, lines 193-198</u></b>                                            |
| 10 |                            |     |                                                                                |
| 11 |                            | 18b | Plans to promote participant retention and complete follow-up,                 |
| 12 |                            |     | including list of any outcome data to be collected for participants who        |
| 13 |                            |     | discontinue or deviate from intervention protocols                             |
| 14 |                            |     | <b><u>Page 8, lines 174-177</u></b>                                            |
| 15 |                            |     |                                                                                |
| 16 | Data                       | 19  | Plans for data entry, coding, security, and storage, including any             |
| 17 | management                 |     | related processes to promote data quality (eg, double data entry;              |
| 18 |                            |     | range checks for data values). Reference to where details of data              |
| 19 |                            |     | management procedures can be found, if not in the protocol                     |
| 20 |                            |     | <b><u>Page 6, lines 136-139</u></b>                                            |
| 21 |                            |     | <b><u>Protocol version 1.9, chapter 10.1 (Handling and storage of data</u></b> |
| 22 |                            |     | <b><u>and documents) and 10.2 (Monitoring and Quality Assurance)</u></b>       |
| 23 |                            |     |                                                                                |
| 24 | Statistical                | 20a | Statistical methods for analysing primary and secondary outcomes.              |
| 25 | methods                    |     | Reference to where other details of the statistical analysis plan can be       |
| 26 |                            |     | found, if not in the protocol                                                  |
| 27 |                            |     | <b><u>Pages 8-9, lines 183-206</u></b>                                         |
| 28 |                            | 20b | Methods for any additional analyses (eg, subgroup and adjusted                 |
| 29 |                            |     | analyses)                                                                      |
| 30 |                            |     | <b><u>Page 9, lines 204-206</u></b>                                            |
| 31 |                            |     |                                                                                |
| 32 |                            | 20c | Definition of analysis population relating to protocol non-adherence           |
| 33 |                            |     | (eg, as randomised analysis), and any statistical methods to handle            |
| 34 |                            |     | missing data (eg, multiple imputation)                                         |
| 35 |                            |     | <b><u>Page 9, lines 198-200</u></b>                                            |
| 36 |                            |     |                                                                                |
| 37 |                            |     |                                                                                |
| 38 |                            |     |                                                                                |
| 39 |                            |     |                                                                                |
| 40 |                            |     |                                                                                |
| 41 |                            |     |                                                                                |
| 42 |                            |     |                                                                                |
| 43 |                            |     |                                                                                |
| 44 | <b>Methods: Monitoring</b> |     |                                                                                |
| 45 | Data monitoring            | 21a | Composition of data monitoring committee (DMC); summary of its role            |
| 46 |                            |     | and reporting structure; statement of whether it is independent from           |
| 47 |                            |     | the sponsor and competing interests; and reference to where further            |
| 48 |                            |     | details about its charter can be found, if not in the protocol.                |
| 49 |                            |     | Alternatively, an explanation of why a DMC is not needed                       |
| 50 |                            |     | <b><u>Page 6, lines 148-150</u></b>                                            |
| 51 |                            |     |                                                                                |
| 52 |                            | 21b | Description of any interim analyses and stopping guidelines, including         |
| 53 |                            |     | who will have access to these interim results and make the final               |
| 54 |                            |     | decision to terminate the trial                                                |
| 55 |                            |     | <b><u>Not applicable</u></b>                                                   |
| 56 |                            |     |                                                                                |
| 57 |                            |     |                                                                                |
| 58 |                            |     |                                                                                |
| 59 |                            |     |                                                                                |
| 60 |                            |     |                                                                                |

|    |                                 |     |                                                                                               |
|----|---------------------------------|-----|-----------------------------------------------------------------------------------------------|
| 1  |                                 |     |                                                                                               |
| 2  | Harms                           | 22  | Plans for collecting, assessing, reporting, and managing solicited and                        |
| 3  |                                 |     | spontaneously reported adverse events and other unintended effects                            |
| 4  |                                 |     | of trial interventions or trial conduct                                                       |
| 5  |                                 |     | <b><u>Protocol version 1.9, chapter 7 (Safety Reporting)</u></b>                              |
| 6  |                                 |     |                                                                                               |
| 7  | Auditing                        | 23  | Frequency and procedures for auditing trial conduct, if any, and                              |
| 8  |                                 |     | whether the process will be independent from investigators and the                            |
| 9  |                                 |     | sponsor                                                                                       |
| 10 |                                 |     | <b><u>Page 6, lines 136-139</u></b>                                                           |
| 11 |                                 |     | <b><u>Protocol version 1.9, chapter 10.1 (Handling and storage of data</u></b>                |
| 12 |                                 |     | <b><u>and documents) and 10.2 (Monitoring and Quality Assurance)</u></b>                      |
| 13 |                                 |     |                                                                                               |
| 14 |                                 |     |                                                                                               |
| 15 |                                 |     |                                                                                               |
| 16 | <b>Ethics and dissemination</b> |     |                                                                                               |
| 17 |                                 |     |                                                                                               |
| 18 | Research ethics                 | 24  | Plans for seeking research ethics committee/institutional review board                        |
| 19 | approval                        |     | (REC/IRB) approval                                                                            |
| 20 |                                 |     | <b><u>Page 11, lines 268-270</u></b>                                                          |
| 21 |                                 |     |                                                                                               |
| 22 | Protocol                        | 25  | Plans for communicating important protocol modifications (eg,                                 |
| 23 | amendments                      |     | changes to eligibility criteria, outcomes, analyses) to relevant parties                      |
| 24 |                                 |     | (eg, investigators, REC/IRBs, trial participants, trial registries, journals,                 |
| 25 |                                 |     | regulators)                                                                                   |
| 26 |                                 |     | <b><u>Protocol version 1.9, chapter 10.3 (Amendments)</u></b>                                 |
| 27 |                                 |     |                                                                                               |
| 28 |                                 |     |                                                                                               |
| 29 | Consent or assent               | 26a | Who will obtain informed consent or assent from potential trial                               |
| 30 |                                 |     | participants or authorised surrogates, and how (see Item 32)                                  |
| 31 |                                 |     | <b><u>Page 7, lines 135-142</u></b>                                                           |
| 32 |                                 |     | <b><u>Protocol version 1.9, chapter 9.2 (Recruitment and informed</u></b>                     |
| 33 |                                 |     | <b><u>consent)</u></b>                                                                        |
| 34 |                                 |     |                                                                                               |
| 35 |                                 |     |                                                                                               |
| 36 |                                 | 26b | Additional consent provisions for collection and use of participant data                      |
| 37 |                                 |     | and biological specimens in ancillary studies, if applicable                                  |
| 38 |                                 |     | <b><u>Not applicable</u></b>                                                                  |
| 39 |                                 |     |                                                                                               |
| 40 |                                 |     |                                                                                               |
| 41 | Confidentiality                 | 27  | How personal information about potential and enrolled participants will                       |
| 42 |                                 |     | be collected, shared, and maintained in order to protect confidentiality                      |
| 43 |                                 |     | before, during, and after the trial                                                           |
| 44 |                                 |     | <b><u>Page 7, lines 136-142</u></b>                                                           |
| 45 |                                 |     | <b><u>Protocol version 1.9, chapter 10.1 (Handling and storage of data</u></b>                |
| 46 |                                 |     | <b><u>and documents)</u></b>                                                                  |
| 47 |                                 |     |                                                                                               |
| 48 |                                 |     |                                                                                               |
| 49 | Declaration of                  | 28  | Financial and other competing interests for principal investigators for                       |
| 50 | interests                       |     | the overall trial and each study site                                                         |
| 51 |                                 |     | <b><u>Page 11, line 274</u></b>                                                               |
| 52 |                                 |     |                                                                                               |
| 53 |                                 |     |                                                                                               |
| 54 | Access to data                  | 29  | Statement of who will have access to the final trial dataset, and                             |
| 55 |                                 |     | disclosure of contractual agreements that limit such access for                               |
| 56 |                                 |     | investigators                                                                                 |
| 57 |                                 |     | <a href="https://www.trialregister.nl/trial/7148">https://www.trialregister.nl/trial/7148</a> |
| 58 |                                 |     |                                                                                               |
| 59 |                                 |     |                                                                                               |
| 60 |                                 |     |                                                                                               |

|    |                   |     |                                                                                                                      |
|----|-------------------|-----|----------------------------------------------------------------------------------------------------------------------|
| 1  |                   |     |                                                                                                                      |
| 2  | Ancillary and     | 30  | Provisions, if any, for ancillary and post-trial care, and for                                                       |
| 3  | post-trial care   |     | compensation to those who suffer harm from trial participation                                                       |
| 4  |                   |     | <b><u>Protocol version 1.9, chapter 9.4 (Compensation for injury)</u></b>                                            |
| 5  |                   |     |                                                                                                                      |
| 6  | Dissemination     | 31a | Plans for investigators and sponsor to communicate trial results to                                                  |
| 7  | policy            |     | participants, healthcare professionals, the public, and other relevant                                               |
| 8  |                   |     | groups (eg, via publication, reporting in results databases, or other                                                |
| 9  |                   |     | data sharing arrangements), including any publication restrictions                                                   |
| 10 |                   |     | <b><u>Page 11, lines 269-270</u></b>                                                                                 |
| 11 |                   |     | <a href="https://www.trialregister.nl/trial/7148">https://www.trialregister.nl/trial/7148</a> (IPD plan description) |
| 12 |                   |     |                                                                                                                      |
| 13 |                   | 31b | Authorship eligibility guidelines and any intended use of professional                                               |
| 14 |                   |     | writers                                                                                                              |
| 15 |                   |     | <b><u>Assignment of writing committees:</u></b>                                                                      |
| 16 |                   |     | Topics suggested for presentation or publication will be shared with                                                 |
| 17 |                   |     | the ARTICA trial team, after which authorship will be discussed in                                                   |
| 18 |                   |     | team meetings.                                                                                                       |
| 19 |                   |     |                                                                                                                      |
| 20 |                   | 31c | Plans, if any, for granting public access to the full protocol, participant-                                         |
| 21 |                   |     | level dataset, and statistical code                                                                                  |
| 22 |                   |     | <a href="https://www.trialregister.nl/trial/7148">https://www.trialregister.nl/trial/7148</a> (IPD plan description) |
| 23 |                   |     |                                                                                                                      |
| 24 |                   |     |                                                                                                                      |
| 25 |                   |     |                                                                                                                      |
| 26 |                   |     |                                                                                                                      |
| 27 |                   |     |                                                                                                                      |
| 28 | <b>Appendices</b> |     |                                                                                                                      |
| 29 | Informed consent  | 32  | Model consent form and other related documentation given to                                                          |
| 30 | materials         |     | participants and authorised surrogates                                                                               |
| 31 |                   |     | <b>An English version of the Subject information and consent form</b>                                                |
| 32 |                   |     | <b>will be added to the manuscript</b>                                                                               |
| 33 |                   |     |                                                                                                                      |
| 34 |                   |     |                                                                                                                      |
| 35 | Biological        | 33  | Plans for collection, laboratory evaluation, and storage of biological                                               |
| 36 | specimens         |     | specimens for genetic or molecular analysis in the current trial and for                                             |
| 37 |                   |     | future use in ancillary studies, if applicable                                                                       |
| 38 |                   |     | <b><u>Not applicable</u></b>                                                                                         |
| 39 |                   |     |                                                                                                                      |

---

\*It is strongly recommended that this checklist be read in conjunction with the SPIRIT 2013 Explanation & Elaboration for important clarification on the items. Amendments to the protocol should be tracked and dated. The SPIRIT checklist is copyrighted by the SPIRIT Group under the Creative Commons "[Attribution-NonCommercial-NoDerivs 3.0 Unported](https://creativecommons.org/licenses/by-nc-nd/3.0/)" license.
